# Supplementary material for: Bayesian high-dimensional semi-parametric inference beyond sub-Gaussian errors
Source: Springer Nature journal article supplement (doi:10.1007/s42952-020-00091-4), 2020-11-12
Supplement: 42952_2020_91_MOESM1_ESM.pdf [file 42952_2020_91_MOESM1_ESM.pdf]

# Supplementary Material for “Bayesian High-dimensional Semi-parametric Inference beyond sub-Gaussian Errors”

Kyoungjae Lee · Minwoo Chae · Lizhen Lin

Received: date / Accepted: date

## 1 Notation for Proofs

For given real-valued functions  $l$  and  $u$ , we define the bracket  $[l, u]$  as the set of all functions  $f$  such that  $l \leq f \leq u$ . We call a bracket  $[l, u]$  an  $\epsilon$ -bracket if  $d(l, u) < \epsilon$  for a given constant  $\epsilon > 0$  and a (semi-)metric  $d$ . For a given class of real-valued functions  $\mathcal{F}$ , the bracketing number  $N_{[]}(\epsilon, \mathcal{F}, d)$  is the minimal number of  $\epsilon$ -brackets which is needed to cover  $\mathcal{F}$ . The covering number  $N(\epsilon, \mathcal{F}, d)$  is the minimal number of  $\epsilon$ -balls,  $\{g : d(f, g) < \epsilon\}$ , which is needed to cover  $\mathcal{F}$ .

For given constant  $\epsilon > 0$ , the class of real-valued functions  $\mathcal{F}$  on  $\mathbb{R}^p \times \mathbb{R}$  and the data  $D_n = \{(Y_1, x_1), \dots, (Y_n, x_n)\}$ , we denote  $N_{[]}^n(\epsilon, \mathcal{F})$  as the minimal number of partition  $\{\mathcal{F}_1, \dots, \mathcal{F}_N\}$  of  $\mathcal{F}$  such that

$$\sup_{1 \leq j \leq N} \frac{1}{n} \sum_{i=1}^n \mathbb{E}_{\theta_0, \eta_0} \left[ \sup_{f, g \in \mathcal{F}_j} |f(x_i, Y_i) - g(x_i, Y_i)|^2 \right] \leq \epsilon^2.$$

We define the set of density functions

$$\mathcal{H}_{\text{mix}} := \left\{ \eta(\cdot) = \int \phi_\sigma(\cdot - z) d\bar{F}(z) : \sigma > 0, F \in \mathcal{M}[-C'n, C'n] \right\} \quad (1.1)$$

for the constant  $C' > 0$  used in (??). Recall that  $\bar{F} = (F + F^-)/2$ ,  $dF^-(z) = dF(-z)$  and  $\phi_\sigma(z) = (\sqrt{2\pi}\sigma)^{-1} \exp\{-z^2/(2\sigma^2)\}$ , for any  $z \in \mathbb{R}$ .

---

Kyoungjae Lee  
Department of Statistics, Inha University  
E-mail: leekjstat@gmail.com

Minwoo Chae  
Department of Industrial and Management Engineering, Pohang University of Science and Technology

Lizhen Lin  
Department of Applied and Computational Mathematics and Statistics, The University of Notre Dame

## 2 Proofs for Posterior Convergence Rates

**Lemma 1** *Assume that the prior conditions (2)-(8) hold and  $\eta_0$  satisfies (D1)-(D4). If  $\log p \leq n^2$ , then there exists a constant  $C_{\text{lower}} > 0$  not depending on  $(n, p)$  such that the  $\mathbb{P}_{\theta_0, \eta_0}$ -probability of the event*

$$\begin{aligned} & \int_{\Theta \times \mathcal{H}_{\text{mix}}} R_n(\theta, \eta) d\Pi(\theta, \eta) \\ & \geq \exp \left[ C_{\text{lower}} \{ \log \pi_p(s_0) - s_0 \log p - \lambda \|\theta_0\|_1 - n\tilde{\epsilon}_n^2 \} \right] \end{aligned} \quad (2.2)$$

converges to 1 as  $n \rightarrow \infty$ , where  $\tilde{\epsilon}_n = n^{-\beta/(2\beta+\kappa^*)}(\log n)^{t_0}$  and  $t_0 = \{\kappa^*(1 + \tau^{-1} + \beta^{-1}) + 1\}/(2 + \kappa^*\beta^{-1})$ .

*Proof* Let  $\tilde{\sigma}_{0n}^\beta = \tilde{\epsilon}_n(\log(1/\tilde{\epsilon}_n))^{-1}$ , and define

$$\begin{aligned} \tilde{\mathcal{H}}_n := \left\{ \eta \in \mathcal{H}_{\text{mix}} : \mathbb{E}_{\eta_0}(\log \eta_0/\eta) \leq A\tilde{\epsilon}_n^2, \mathbb{E}_{\eta_0}(\log \eta_0/\eta)^2 \leq A\tilde{\epsilon}_n^2, \right. \\ \left. \sigma^{-2} \leq \tilde{\sigma}_{0n}^{-2}(1 + \tilde{\sigma}_{0n}^{2\beta}) \right\}, \end{aligned} \quad (2.3)$$

for some constant  $A > 0$ , and

$$\tilde{\Theta}_n := \{ \theta \in \Theta : \|\theta - \theta_0\|_1 \leq n^{-5}, S_\theta = S_0 \}.$$

Note that

$$\begin{aligned} \int_{\Theta \times \mathcal{H}_{\text{mix}}} R_n(\theta, \eta) d\Pi(\theta, \eta) & \geq \int_{\tilde{\Theta}_n \times \tilde{\mathcal{H}}_n} R_n(\theta, \eta) d\Pi(\theta, \eta) \\ & = \int_{\tilde{\Theta}_n \times \tilde{\mathcal{H}}_n} R_n(\theta, \eta) d\tilde{\Pi}(\theta, \eta) \cdot \Pi(\tilde{\Theta}_n \times \tilde{\mathcal{H}}_n), \end{aligned}$$

where  $\tilde{\Pi} = \Pi|_{\tilde{\Theta}_n \times \tilde{\mathcal{H}}_n}$  is the restricted and renormalized prior on  $\tilde{\Theta}_n \times \tilde{\mathcal{H}}_n$ , that is,  $\tilde{\Pi}(\cdot) = \Pi(\cdot \cap \tilde{\Theta}_n \times \tilde{\mathcal{H}}_n)/\Pi(\tilde{\Theta}_n \times \tilde{\mathcal{H}}_n)$ . We will show that

$$\Pi(\tilde{\Theta}_n \times \tilde{\mathcal{H}}_n) \geq \exp \left[ \tilde{C}_1 (\log \pi_p(s_0) - s_0 \log p - \lambda \|\theta_0\|_1 - n\tilde{\epsilon}_n^2) \right] \quad (2.4)$$

for some constant  $\tilde{C}_1 > 0$  and all sufficiently large  $n$ , and

$$\begin{aligned} & \mathbb{P}_{\theta_0, \eta_0} \left( \int_{\tilde{\Theta}_n \times \tilde{\mathcal{H}}_n} R_n(\theta, \eta) d\tilde{\Pi}(\theta, \eta) \leq \exp(-\tilde{C}_2 n\tilde{\epsilon}_n^2) \right) \\ & \leq \frac{2(A + M^2)}{(\tilde{C}_2 - A - 2M)^2 n\tilde{\epsilon}_n^2} \end{aligned} \quad (2.5)$$

for some constant  $\tilde{C}_2 > A + 2M$ . Then, (2.4) and (2.5) complete the proof by taking  $C_{\text{lower}} = (\tilde{C}_1 \vee \tilde{C}_2)$ .

To obtain inequality (2.4), because  $\Pi(\tilde{\Theta}_n \times \tilde{\mathcal{H}}_n) = \Pi_\Theta(\tilde{\Theta}_n) \Pi_{\mathcal{H}}(\tilde{\mathcal{H}}_n)$ , we derive lower bounds for  $\Pi_\Theta(\tilde{\Theta}_n)$  and  $\Pi_{\mathcal{H}}(\tilde{\mathcal{H}}_n)$  separately. By Lemma 2, we have

$$\Pi_{\mathcal{H}}(\tilde{\mathcal{H}}_n) \geq \exp(-C_{\mathcal{H}} n\tilde{\epsilon}_n^2) \quad (2.6)$$

for all sufficiently large  $n$  and some constant  $C_{\mathcal{H}} > 0$  not depending on  $(n, p)$ . By the definition of  $\Pi_{\Theta}$ , we have

$$\Pi_{\Theta}(\tilde{\Theta}_n) = \int_{\tilde{\Theta}_n} d\Pi_{\Theta}(\theta) = \pi_p(s_0) \binom{p}{s_0}^{-1} \int_{\tilde{\Theta}_n} g_{S_0}(\theta_{S_0}) d\theta_{S_0}$$

and

$$\begin{aligned} & \int_{\tilde{\Theta}_n} g_{S_0}(\theta_{S_0}) d\theta_{S_0} \\ & \geq e^{-\lambda\|\theta_0\|_1} \int_{\tilde{\Theta}_n} g_{S_0}(\theta_{S_0} - \theta_{0,S_0}) d\theta_{S_0} \\ & = e^{-\lambda\|\theta_0\|_1} \int_{\tilde{\Theta}_n} \left(\frac{\lambda}{2}\right)^{s_0} e^{-\lambda\|\theta_{S_0} - \theta_{0,S_0}\|_1} d\theta_{S_0} \\ & \geq e^{-\lambda\|\theta_0\|_1} \left(\frac{\lambda}{2}\right)^{s_0} e^{-\lambda n^{-5}} \int_{\{\theta_{S_0} \in \mathbb{R}^{s_0} : \|\theta_{S_0} - \theta_{0,S_0}\|_2 \leq (s_0 n^{10})^{-1/2}\}} d\theta_{S_0} \\ & \geq e^{-\lambda\|\theta_0\|_1} \left(\frac{\lambda}{2}\right)^{s_0} e^{-\lambda n^{-1/2}} \frac{\pi^{s_0/2}}{\Gamma(s_0/2 + 1)} (s_0 n^{10})^{-s_0/2}. \end{aligned}$$

Thus, the lower bound for  $\Pi_{\Theta}(\tilde{\Theta}_n)$  is given by

$$\begin{aligned} & \Pi_{\Theta}(\tilde{\Theta}_n) \\ & \geq \pi_p(s_0) \binom{p}{s_0}^{-1} e^{-\lambda\|\theta_0\|_1 - \lambda n^{-1/2}} \left(\frac{\lambda\sqrt{\pi}}{2\sqrt{s_0 n^5}}\right)^{s_0} \frac{1}{\Gamma(s_0/2 + 1)} \\ & \geq \pi_p(s_0) p^{-s_0} \Gamma(s_0 + 1) e^{-\lambda\|\theta_0\|_1 - \sqrt{\log p}} \left(\frac{\sqrt{\pi}\sqrt{n}/p}{2\sqrt{s_0 n^5}}\right)^{s_0} \frac{1}{\Gamma(s_0/2 + 1)} \\ & \geq \exp\left\{\log \pi_p(s_0) - s_0 \log p - \lambda\|\theta_0\|_1 - \sqrt{\log p}\right\} \left(\frac{1}{\sqrt{s_0 n^5 p}}\right)^{s_0} \\ & \geq \exp\left\{\log \pi_p(s_0) - s_0 \log p - \lambda\|\theta_0\|_1 - \frac{1}{2}s_0 \log p - s_0 \log(\sqrt{s_0 n^5 p})\right\} \\ & \geq \exp\left[8\{\log \pi_p(s_0) - s_0 \log p - \lambda\|\theta_0\|_1\}\right] \end{aligned}$$

for all sufficiently large  $n$  because we assume  $p \geq n$ . Thus,

$$\begin{aligned} & \Pi(\tilde{\Theta}_n \times \tilde{\mathcal{H}}_n) \\ & = \Pi_{\Theta}(\tilde{\Theta}_n) \Pi_{\mathcal{H}}(\tilde{\mathcal{H}}_n) \\ & \geq \exp\left[8\{\log \pi_p(s_0) - s_0 \log p - \lambda\|\theta_0\|_1\}\right] \exp(-C_{\mathcal{H}} n \tilde{\epsilon}_n^2) \\ & \geq \exp\left[(8 \vee C_{\mathcal{H}})\{\log \pi_p(s_0) - s_0 \log p - \lambda\|\theta_0\|_1 - n \tilde{\epsilon}_n^2\}\right], \end{aligned}$$

which implies (2.4) by taking  $\tilde{C}_1 = (8 \vee C_{\mathcal{H}})$ .

By the Jensen's inequality,

$$\begin{aligned}
& \mathbb{P}_{\theta_0, \eta_0} \left( \int_{\tilde{\Theta}_n \times \tilde{\mathcal{H}}_n} R_n(\theta, \eta) d\tilde{\Pi}(\theta, \eta) \leq \exp(-\tilde{C}_2 n \tilde{\epsilon}_n^2) \right) \\
& \leq \mathbb{P}_{\theta_0, \eta_0} \left( \int_{\tilde{\Theta}_n \times \tilde{\mathcal{H}}_n} \sum_{i=1}^n \left\{ \log \frac{\eta(Y_i - x_i^T \theta)}{\eta_0(Y_i - x_i^T \theta_0)} \right\} d\tilde{\Pi}(\theta, \eta) \leq -\tilde{C}_2 n \tilde{\epsilon}_n^2 \right) \\
& = \mathbb{P}_{\theta_0, \eta_0} \left( \sqrt{n}(\tilde{\mathbb{P}}_n - P_0) \leq -\tilde{C}_2 \sqrt{n} \tilde{\epsilon}_n^2 - \sqrt{n} P_0 \right), \tag{2.7}
\end{aligned}$$

where  $\tilde{\mathbb{P}}_n := n^{-1} \sum_{i=1}^n \int_{\tilde{\Theta}_n \times \tilde{\mathcal{H}}_n} \log[\eta(Y_i - x_i^T \theta)/\eta_0(Y_i - x_i^T \theta_0)] d\tilde{\Pi}(\theta, \eta)$  and  $P_0 := \mathbb{E}_{\theta_0, \eta_0}[\tilde{\mathbb{P}}_n]$ . Note that

$$\begin{aligned}
-P_0 & \leq \max_i \mathbb{E}_{\theta_0, \eta_0} \left[ \int_{\tilde{\Theta}_n \times \tilde{\mathcal{H}}_n} \log \frac{\eta_0(Y_i - x_i^T \theta_0)}{\eta(Y_i - x_i^T \theta)} d\tilde{\Pi}(\theta, \eta) \right] \\
& = \max_i \int_{\tilde{\Theta}_n \times \tilde{\mathcal{H}}_n} \mathbb{E}_{\theta_0, \eta_0} \left( \log \frac{\eta_0(Y_i - x_i^T \theta_0)}{\eta(Y_i - x_i^T \theta)} \right) d\tilde{\Pi}(\theta, \eta) \\
& = \max_i \int_{\tilde{\Theta}_n \times \tilde{\mathcal{H}}_n} \mathbb{E}_{\theta_0, \eta_0} \left( \log \frac{\eta_0(Y_i - x_i^T \theta_0)}{\eta(Y_i - x_i^T \theta_0)} + \log \frac{\eta(Y_i - x_i^T \theta_0)}{\eta(Y_i - x_i^T \theta)} \right) d\tilde{\Pi}(\theta, \eta) \\
& \leq A \tilde{\epsilon}_n^2 + \max_i \int_{\tilde{\Theta}_n \times \tilde{\mathcal{H}}_n} \int \log \frac{\eta(y_i - x_i^T \theta_0)}{\eta(y_i - x_i^T \theta)} \eta_0(y_i - x_i^T \theta_0) dy_i d\tilde{\Pi}(\theta, \eta)
\end{aligned}$$

and

$$\begin{aligned}
& \int \log \frac{\eta(y - x^T \theta_0)}{\eta(y - x^T \theta)} \eta_0(y - x^T \theta_0) dy \\
& \leq |x^T(\theta - \theta_0)| \int |\dot{\ell}_\eta(y - x^T \theta_0 + tx^T(\theta_0 - \theta))| \eta_0(y - x^T \theta_0) dy \tag{2.8}
\end{aligned}$$

for some  $t \in [0, 1]$  by the mean value theorem. Note that for any  $y \in \mathbb{R}$ ,

$$\begin{aligned}
\sup_{\eta \in \tilde{\mathcal{H}}_n} |\dot{\ell}_\eta(y)| & \leq \sup_{\eta \in \tilde{\mathcal{H}}_n} \frac{\frac{1}{\sigma^2} \int |y - z| \phi_\sigma(y - z) d\bar{F}(z)}{\int \phi_\sigma(y - z) d\bar{F}(z)} \\
& \leq \sup_{\eta \in \tilde{\mathcal{H}}_n} \frac{1}{\sigma^2} (|y| + C'n) \\
& \leq \tilde{\sigma}_{0n}^{-2} (1 + \tilde{\sigma}_{0n}^{2\beta}) (|y| + C'n) \\
& \leq n^2 (|y| + n)
\end{aligned}$$

for all sufficiently large  $n$ . The above supremum is essentially taken over  $(F, \sigma)$  satisfying (2.3) because of definitions of (1.1) and (2.3). Thus, the right hand

side of (2.8) is bounded above by

$$\begin{aligned}
& M\sqrt{\log p}\|\theta - \theta_0\|_1 \int n^2 (|y - x^T\theta_0| + |x^T(\theta - \theta_0)| + n) \eta_0(y - x^T\theta_0) dy \\
& \leq M\sqrt{\log p}\|\theta - \theta_0\|_1 n^2 \\
& \quad \times \left\{ \int |y - x^T\theta_0| \eta_0(y - x^T\theta_0) dy + M\sqrt{\log p}\|\theta - \theta_0\|_1 + n \right\} \\
& \leq 2M\sqrt{\log p} n^{-2} \leq 2Mn^{-1}
\end{aligned}$$

for all sufficiently large  $n$  on  $\tilde{\Theta}_n \times \tilde{\mathcal{H}}_n$ , because we assume condition (D2) and  $\log p \leq n^2$ . Therefore, (2.7) is bounded above by

$$\begin{aligned}
& \mathbb{P}_{\theta_0, \eta_0} \left( \sqrt{n}(\tilde{\mathbb{P}}_n - P_0) \leq -\tilde{C}_2\sqrt{n}\tilde{\epsilon}_n^2 + \sqrt{n}(A\tilde{\epsilon}_n^2 + 2Mn^{-1}) \right) \\
& \leq \mathbb{P}_{\theta_0, \eta_0} \left( \sqrt{n}(\tilde{\mathbb{P}}_n - P_0) \leq -(\tilde{C}_2 - A - 2M)\sqrt{n}\tilde{\epsilon}_n^2 \right) \\
& \leq \frac{1}{(\tilde{C}_2 - A - 2M)^2 n \tilde{\epsilon}_n^4} \\
& \quad \times \max_i \text{Var}_{\theta_0, \eta_0} \left[ \int_{\tilde{\Theta}_n \times \tilde{\mathcal{H}}_n} \log \eta(Y_i - x_i^T \theta) - \log \eta_0(Y_i - x_i^T \theta_0) d\tilde{\Pi}(\theta, \eta) \right] \\
& \leq \frac{1}{(\tilde{C}_2 - A - 2M)^2 n \tilde{\epsilon}_n^4} \\
& \quad \times \max_i \mathbb{E}_{\theta_0, \eta_0} \left[ \int_{\tilde{\Theta}_n \times \tilde{\mathcal{H}}_n} (\log \eta(Y_i - x_i^T \theta) - \log \eta_0(Y_i - x_i^T \theta_0)) d\tilde{\Pi}(\theta, \eta) \right]^2 \\
& \leq \frac{1}{(\tilde{C}_2 - A - 2M)^2 n \tilde{\epsilon}_n^4} \\
& \quad \times \max_i \mathbb{E}_{\theta_0, \eta_0} \left[ \int_{\tilde{\Theta}_n \times \tilde{\mathcal{H}}_n} (\log \eta(Y_i - x_i^T \theta) - \log \eta_0(Y_i - x_i^T \theta_0))^2 d\tilde{\Pi}(\theta, \eta) \right] \\
& = \frac{1}{(\tilde{C}_2 - A - 2M)^2 n \tilde{\epsilon}_n^4} \max_i \int_{\tilde{\Theta}_n \times \tilde{\mathcal{H}}_n} \mathbb{E}_{\theta_0, \eta_0} \left( \log \frac{\eta_0(Y_i - x_i^T \theta_0)}{\eta(Y_i - x_i^T \theta)} \right)^2 d\tilde{\Pi}(\theta, \eta)
\end{aligned}$$

for all sufficiently large  $n$  and any constant  $\tilde{C}_2 > A + 2M$ . The second and fourth inequalities follow from the Chebyshev's inequality and Jensen's inequality, respectively. Note that

$$\begin{aligned}
& \mathbb{E}_{\theta_0, \eta_0} \left( \log \frac{\eta_0(Y_i - x_i^T \theta_0)}{\eta(Y_i - x_i^T \theta)} \right)^2 \\
& \leq 2\mathbb{E}_{\theta_0, \eta_0} \left( \log \frac{\eta_0(Y_i - x_i^T \theta_0)}{\eta(Y_i - x_i^T \theta_0)} \right)^2 + 2\mathbb{E}_{\theta_0, \eta_0} \left( \log \frac{\eta(Y_i - x_i^T \theta_0)}{\eta(Y_i - x_i^T \theta)} \right)^2 \\
& \leq 2A\tilde{\epsilon}_n^2 + 2\mathbb{E}_{\theta_0, \eta_0} \left( \log \frac{\eta(Y_i - x_i^T \theta_0)}{\eta(Y_i - x_i^T \theta)} \right)^2
\end{aligned}$$

and

$$\begin{aligned}
& \int \left( \log \frac{\eta(y - x^T \theta_0)}{\eta(y - x^T \theta)} \right)^2 \eta_0(y - x^T \theta_0) dy \\
& \leq \{x^T(\theta - \theta_0)\}^2 \int |\dot{\ell}_\eta(y - x^T \theta_0 + tx^T(\theta_0 - \theta))|^2 \eta_0(y - x^T \theta_0) dy \\
& \leq M^2 \log p \|\theta - \theta_0\|_1^2 n^4 \left\{ \int 2y^2 \eta_0(y) dy + 4M^2 \log p \|\theta - \theta_0\|_1^2 + 4n^2 \right\} \\
& \leq M^2 n^{-1}
\end{aligned}$$

for all sufficiently large  $n$  on  $\tilde{\Theta}_n \times \tilde{\mathcal{H}}_n$ . Thus, we have

$$\mathbb{P}_{\theta_0, \eta_0} \left( \int_{\tilde{\Theta}_n \times \tilde{\mathcal{H}}_n} R_n(\theta, \eta) d\tilde{\Pi}(\theta, \eta) \leq \exp(-\tilde{C}_2 n \tilde{\epsilon}_n^2) \right) \leq \frac{2(A + M^2)}{(\tilde{C}_2 - A - 2M)^2 n \tilde{\epsilon}_n^2}$$

for all sufficiently large  $n$ , which completes the proof.  $\blacksquare$

**Lemma 2** *Under the conditions in Lemma 1,*

$$\Pi_{\mathcal{H}}(\tilde{\mathcal{H}}_n) \geq \exp(-C_{\mathcal{H}} n \tilde{\epsilon}_n^2),$$

for some constant  $C_{\mathcal{H}} > 0$  not depending on  $(n, p)$ , where  $\tilde{\mathcal{H}}_n$  and  $\tilde{\epsilon}_n$  are defined at (2.3) and Lemma 1, respectively.

*Proof* We closely follow the steps in the proof of Theorem 4 in ?. We consider the univariate density case while the original proof in ? considers  $d$ -dimensional case.

By Proposition 1 in ?, there exist constants  $\delta, s_0, a_0, B_0$  and  $K_0$  not depending on  $(n, p)$  such that

$$d_H(\eta_0, K_\sigma \tilde{h}_\sigma) \leq K_0 \sigma^\beta \tag{2.9}$$

and

$$\mathbb{P}_{\theta_0, \eta_0}(E_\sigma^c) \leq B_0 \sigma^{4\beta + 2\nu + 8}$$

for any  $\sigma \in (0, s_0)$ , where  $K_\sigma \tilde{h}_\sigma = \int \phi_\sigma(x - z) \tilde{h}_\sigma(z) dz$ ,  $\tilde{h}_\sigma$  is a probability density function with support inside  $(-a_\sigma, a_\sigma)$ ,  $a_\sigma = a_0 \{\log(1/\sigma)\}^\tau$  and  $E_\sigma := \{x \in \mathbb{R} : \eta_0(x) \geq \sigma^{(4\beta + 2\nu + 8)/\delta}\} \subset \{x \in \mathbb{R} : |x| \leq a_\sigma\}$ . Fix  $b_1 > \{1 \vee 1/(2\beta)\}$  such that  $\tilde{\epsilon}_n^{b_1} \{\log(1/\tilde{\epsilon}_n)\}^{5/4} \leq \tilde{\epsilon}_n$ . Let  $S_{\tilde{\sigma}_{0n}} = \{\sigma > 0 : \sigma^{-2} \in [\tilde{\sigma}_{0n}^{-2}, \tilde{\sigma}_{0n}^{-2}(1 + \tilde{\sigma}_{0n}^{2\beta})]\}$ , where  $\tilde{\sigma}_{0n} = \tilde{\epsilon}_n^{1/\beta} \{\log(1/\tilde{\epsilon}_n)\}^{-1/\beta}$ . Suppose that  $\sigma \in S_{\tilde{\sigma}_{0n}}$ .

By Corollary B1 in ?, there exists a probability measure  $F_\sigma = \sum_{j=1}^N p_j \delta_{z_j}$  satisfying

$$d_H(K_\sigma \tilde{h}_\sigma, \eta_{F_\sigma, \sigma}) \leq \tilde{A}_1 \tilde{\epsilon}_n^{b_1} \{\log(1/\tilde{\epsilon}_n)\}^{1/4}, \tag{2.10}$$

where  $N \leq D_0 \sigma^{-1} \{\log(1/\sigma)\}^{1/\tau} \log(1/\tilde{\epsilon}_n)$ ,  $z_i \in [-a_\sigma, a_\sigma]$  ( $i = 1, \dots, N$ ) and  $\min_{i \neq j} |z_i - z_j| \geq \sigma \tilde{\epsilon}_n^{2b_1}$ , for some universal constants  $\tilde{A}_1$  and  $D_0 > 0$ . Note

that  $N \leq D_0 \sigma^{-1} \{\log(1/\sigma)\}^{1/\tau} \log(1/\tilde{\epsilon}_n) \leq D_1 \sigma^{-1} \{\log(1/\tilde{\epsilon}_n)\}^{1+1/\tau}$  for some universal constant  $D_1 > 0$ .

Let  $U_j = \{x \in \mathbb{R} : |x - z_j| \leq \sigma \tilde{\epsilon}_n^{2b_1}/4\}$  for all  $j = 1, \dots, N$ . Then, one can choose  $U_{N+1}, \dots, U_K$  such that (i)  $\{U_1, \dots, U_K\}$  is a partition of  $[-a_\sigma, a_\sigma]$ , (ii) each  $U_j$  ( $j = N+1, \dots, K$ ) has a diameter at most  $\sigma$  and (iii)  $K \leq D_2 \sigma^{-1} \{\log(1/\tilde{\epsilon}_n)\}^{1+1/\tau}$  for some universal constant  $D_2 > 0$ . Furthermore, one can extend this to a partition  $\{U_1, \dots, U_M\}$  of  $[-C'n, C'n]$  such that  $M \leq D_2' \sigma^{-1} \{\log(1/\tilde{\epsilon}_n)\}^{1+1/\tau} \leq D_2' \tilde{\epsilon}_n^{-1/\beta} \{\log(1/\tilde{\epsilon}_n)\}^{1+1/\tau+1/\beta}$  and  $D_3 \sigma \tilde{\epsilon}_n^{2b_1} \leq \alpha(U_j) \leq 1$  for all  $j = 1, \dots, M$  and for some universal constants  $D_2'$  and  $D_3 > 0$  because of the continuity and positivity of  $\alpha$ .

Let  $p_j = 0$  for all  $j = N+1, \dots, M$ . Define  $\mathcal{P}_{\tilde{\sigma}_{0n}}$  as the set of probability measures  $F$  on  $[-C'n, C'n]$  such that

$$\sum_{j=1}^M |F(U_j) - p_j| \leq 2\tilde{\epsilon}_n^{2b_1} \quad \text{and} \quad \min_{1 \leq j \leq M} F(U_j) \geq \frac{1}{2} \tilde{\epsilon}_n^{4b_1}.$$

Then, we have  $\tilde{\epsilon}_n^{2b_1} M \leq D_2' \tilde{\epsilon}_n^{2b_1-1/\beta} \{\log(1/\tilde{\epsilon}_n)\}^{1+1/\tau+1/\beta} \leq 1$  and  $\min_{1 \leq j \leq M} \alpha(U_j) \geq D_3 \sigma \tilde{\epsilon}_n^{2b_1} \geq D_3 \tilde{\epsilon}_n^{4b_1}$  for all large  $n$ . By Lemma 10 in ?,

$$\begin{aligned} \pi(\mathcal{P}_{\tilde{\sigma}_{0n}}) &\geq C_1 \exp\{-c_1 M \log(1/\tilde{\epsilon}_n)\} \\ &\geq C_1 \exp[-c_1 D_2' \tilde{\epsilon}_n^{-1/\beta} \{\log(1/\tilde{\epsilon}_n)\}^{2+1/\tau+1/\beta}] \end{aligned}$$

for some universal constants  $C_1$  and  $c_1 > 0$ . In fact,  $C_1 = \Gamma(\alpha([-C'n, C'n]))$ , but it can be replaced with a universal constant not depending on  $n$  by considering  $\Gamma(\alpha([-C'n, C'n])) \geq \Gamma(\alpha([-C', C'])) =: C_1$ . Also note that, by (??),

$$\begin{aligned} \pi(S_{\tilde{\sigma}_{0n}}) &\geq a_6 \tilde{\sigma}_{0n}^{-2a_4} \tilde{\sigma}_{0n}^{2\beta a_5} \exp(-C'' \tilde{\sigma}_{0n}^{2\beta}) \\ &\geq D_4 \exp[-D_5 \tilde{\epsilon}_n^{-\kappa/\beta} \{\log(1/\tilde{\epsilon}_n)\}^{\kappa/\beta}] \end{aligned}$$

for some universal constant  $D_4 > 0$  and some constant  $D_5 > 0$  depending only on  $C'' > 0$  in (??). Therefore, by Lemma B1 in ? with  $V_j = U_j$  for  $j = 1, \dots, N$  and  $V_0 = \cup_{j=N+1}^M U_j$ , we have

$$d_H(\eta_{F,\sigma}, \eta_{F,\sigma}) \leq \tilde{A}_2 \tilde{\epsilon}_n^{b_1} \quad (2.11)$$

for any  $F \in \mathcal{P}_{\tilde{\sigma}_{0n}}$ ,  $\sigma \in S_{\tilde{\sigma}_{0n}}$  and some constant  $\tilde{A}_2 > 0$  not depending on  $(n, p)$ . Thus, by (2.9)–(2.11),

$$d_H(\eta_0, \eta_{F,\sigma}) \leq \tilde{A}_3 \tilde{\sigma}_{0n}^\beta$$

for any  $F \in \mathcal{P}_{\tilde{\sigma}_{0n}}$ ,  $\sigma \in S_{\tilde{\sigma}_{0n}}$  and some constant  $\tilde{A}_3 > 0$  not depending on  $(n, p)$ . Note that  $d_H^2(\eta_0, \eta_{F, \sigma}) = d_H^2(\eta_0, \eta_{F^-, \sigma})$  due to condition (D4) and

$$\begin{aligned}
d_H^2(\eta_0, \eta_{\bar{F}, \sigma}) &= \int (\sqrt{\eta_0} - \sqrt{\eta_{\bar{F}, \sigma}})^2 d\mu \\
&= \int (\sqrt{\eta_0} - \sqrt{(\eta_{F, \sigma} + \eta_{F^-, \sigma})/2})^2 d\mu \\
&= \int_{|\sqrt{\eta_0} - \sqrt{\eta_{F, \sigma}}| > |\sqrt{\eta_0} - \sqrt{\eta_{F^-, \sigma}}|} (\sqrt{\eta_0} - \sqrt{(\eta_{F, \sigma} + \eta_{F^-, \sigma})/2})^2 d\mu \\
&\quad + \int_{|\sqrt{\eta_0} - \sqrt{\eta_{F, \sigma}}| \leq |\sqrt{\eta_0} - \sqrt{\eta_{F^-, \sigma}}|} (\sqrt{\eta_0} - \sqrt{(\eta_{F, \sigma} + \eta_{F^-, \sigma})/2})^2 d\mu \\
&\leq \int_{|\sqrt{\eta_0} - \sqrt{\eta_{F, \sigma}}| > |\sqrt{\eta_0} - \sqrt{\eta_{F^-, \sigma}}|} (\sqrt{\eta_0} - \sqrt{\eta_{F, \sigma}})^2 d\mu \\
&\quad + \int_{|\sqrt{\eta_0} - \sqrt{\eta_{F, \sigma}}| \leq |\sqrt{\eta_0} - \sqrt{\eta_{F^-, \sigma}}|} (\sqrt{\eta_0} - \sqrt{\eta_{F^-, \sigma}})^2 d\mu \\
&\leq d_H^2(\eta_0, \eta_{F, \sigma}) + d_H^2(\eta_0, \eta_{F^-, \sigma}) = 2d_H^2(\eta_0, \eta_{F, \sigma}).
\end{aligned}$$

Therefore, we have

$$d_H(\eta_0, \eta_{\bar{F}, \sigma}) \leq \sqrt{2} \tilde{A}_3 \tilde{\sigma}_{0n}^\beta$$

for any  $F \in \mathcal{P}_{\tilde{\sigma}_{0n}}$  and  $\sigma \in S_{\tilde{\sigma}_{0n}}$ .

Note that for any  $F \in \mathcal{P}_{\tilde{\sigma}_{0n}}$ ,  $\sigma \in S_{\tilde{\sigma}_{0n}}$  and  $x \in [-a_\sigma, a_\sigma]$ ,

$$\begin{aligned}
\frac{\eta_{\bar{F}, \sigma}(x)}{\eta_0(x)} &\geq \left\{ \sup_{t \in \mathbb{R}} \eta_0(t) \right\}^{-1} (2\pi \tilde{\sigma}_{0n}^2)^{-1/2} \int \exp \left\{ -\frac{(x-z)^2}{2\tilde{\sigma}_{0n}^2} \right\} d\bar{F}(z) \\
&\geq K_1 \tilde{\sigma}_{0n}^{-1} \{F(U_{J(x)}) \wedge F(U_{J(-x)})\} \geq \frac{K_1}{2} \tilde{\sigma}_{0n}^{-1} \tilde{\epsilon}^{4b_1}
\end{aligned}$$

for some universal constant  $K_1 > 0$ , where  $J(x)$  is the index  $j \in \{1, \dots, M\}$  for which  $x \in U_j$ . On the other hand, for any  $F \in \mathcal{P}_{\tilde{\sigma}_{0n}}$ ,  $\sigma \in S_{\tilde{\sigma}_{0n}}$  and  $x \notin [-a_\sigma, a_\sigma]$ ,

$$\begin{aligned}
\frac{\eta_{\bar{F}, \sigma}(x)}{\eta_0(x)} &\geq K_1 \tilde{\sigma}_{0n}^{-1} \int_{|z| \leq a_\sigma} \exp \left\{ -\frac{(x-z)^2}{2\tilde{\sigma}_{0n}^2} \right\} d\bar{F}(z) \\
&\geq K_1 \tilde{\sigma}_{0n}^{-1} \exp \left( -\frac{2x^2}{\tilde{\sigma}_{0n}^2} \right) F(Z : |Z| \leq a_\sigma) \\
&\geq K_1 \tilde{\sigma}_{0n}^{-1} \exp \left( -\frac{2x^2}{\tilde{\sigma}_{0n}^2} \right) (1 - 2\tilde{\epsilon}_n^{2b_1}) \\
&\geq \frac{K_1}{2} \tilde{\sigma}_{0n}^{-1} \exp \left( -\frac{2x^2}{\tilde{\sigma}_{0n}^2} \right)
\end{aligned}$$



for all large  $n$ . The third inequality holds because  $F \in \mathcal{P}_{\tilde{\sigma}_{0n}}$ . Define  $\vartheta = \tilde{\sigma}_{0n}^{-1} \tilde{\epsilon}_n^{4b_1} K_1/2$ , then  $\log(1/\vartheta) \leq K_2 \log(1/\tilde{\epsilon}_n)$  for some constant  $K_2 > 0$  depending only on  $b_1$ . Then, for any  $F \in \mathcal{P}_{\tilde{\sigma}_{0n}}$  and  $\sigma \in S_{\tilde{\sigma}_{0n}}$ ,

$$\begin{aligned}
& \mathbb{E}_{\eta_0} \left[ \left\{ \log \left( \frac{\eta_0}{\eta_{\bar{F},\sigma}} \right) \right\}^2 I \left( \frac{\eta_{\bar{F},\sigma}}{\eta_0} \leq \vartheta \right) \right] \\
& \leq \int_{|x| > a\tilde{\sigma}_{0n}} \left\{ \log \left( \frac{\eta_0(x)}{\eta_{\bar{F},\sigma}(x)} \right) \right\}^2 \eta_0(x) dx \\
& \leq \int_{|x| > a\tilde{\sigma}_{0n}} \left[ \log \left\{ \frac{2\tilde{\sigma}_{0n}}{K_1} \exp \left( \frac{2x^2}{\tilde{\sigma}_{0n}^2} \right) \right\} \right]^2 \eta_0(x) dx \\
& \leq \frac{K_3}{\tilde{\sigma}_{0n}^4} \int_{|x| > a\tilde{\sigma}_{0n}} x^4 \eta_0(x) dx \\
& \leq \frac{K_3}{\tilde{\sigma}_{0n}^4} \left( \mathbb{E}_{\eta_0} X^8 \right)^{1/2} \mathbb{P}_{\eta_0} (E_{\tilde{\sigma}_{0n}}^c) \\
& \leq K_4 \tilde{\sigma}_{0n}^{2\beta+\nu}
\end{aligned}$$

for some constants  $K_3$  and  $K_4 > 0$  not depending on  $(n, p)$  by construction of  $E_{\tilde{\sigma}_{0n}}$ . Since  $\vartheta < e^{-1}$ , it implies that

$$\mathbb{E}_{\eta_0} \left\{ \log \left( \frac{\eta_0}{\eta_{\bar{F},\sigma}} \right) I \left( \frac{\eta_{\bar{F},\sigma}}{\eta_0} \leq \vartheta \right) \right\} \leq K_4 \tilde{\sigma}_{0n}^{2\beta+\nu}.$$

Therefore, by Lemma B2 in ?, for any  $F \in \mathcal{P}_{\tilde{\sigma}_{0n}}$  and  $\sigma \in S_{\tilde{\sigma}_{0n}}$ ,

$$\begin{aligned}
& \mathbb{E}_{\eta_0} \left\{ \log \left( \frac{\eta_0}{\eta_{\bar{F},\sigma}} \right) \right\} \\
& \leq d_H^2(\eta_0, \eta_{\bar{F},\sigma}) \{1 + 2 \log(1/\vartheta)\} + 2 \mathbb{E}_{\eta_0} \left\{ \log \left( \frac{\eta_0}{\eta_{\bar{F},\sigma}} \right) I \left( \frac{\eta_{\bar{F},\sigma}}{\eta_0} \leq \vartheta \right) \right\} \\
& \leq 2\tilde{A}_3^2 \tilde{\sigma}_{0n}^{2\beta} \{1 + 2K_2 \log(1/\tilde{\epsilon}_n)\} + 2K_4 \tilde{\sigma}_{0n}^{2\beta+\nu} \\
& \leq 2\tilde{A}_3^2 (12 + 2K_2^2) \tilde{\epsilon}_n^2
\end{aligned}$$

and

$$\begin{aligned}
& \mathbb{E}_{\eta_0} \left\{ \log \left( \frac{\eta_0}{\eta_{\bar{F},\sigma}} \right) \right\}^2 \\
& \leq d_H^2(\eta_0, \eta_{\bar{F},\sigma}) [12 + 2\{\log(1/\vartheta)\}^2] + 8 \mathbb{E}_{\eta_0} \left[ \left\{ \log \left( \frac{\eta_0}{\eta_{\bar{F},\sigma}} \right) \right\}^2 I \left( \frac{\eta_{\bar{F},\sigma}}{\eta_0} \leq \vartheta \right) \right] \\
& \leq 2\tilde{A}_3^2 \tilde{\sigma}_{0n}^{2\beta} [12 + 2K_2^2 \{\log(1/\tilde{\epsilon}_n)\}] + 8K_4 \tilde{\sigma}_{0n}^{2\beta+\nu} \\
& \leq 2\tilde{A}_3^2 (12 + K_2^2) \tilde{\epsilon}_n^2.
\end{aligned}$$

Thus, by taking  $A = 2\tilde{A}_3^2(12 + 2K_2^2)$  in  $\tilde{\mathcal{H}}_n$  defined at (2.3), we have

$$\begin{aligned}
& \Pi_{\mathcal{H}}(\tilde{\mathcal{H}}_n) \\
& \geq \Pi_{\mathcal{H}}((F, \sigma) : F \in \mathcal{P}_{\tilde{\sigma}_{0n}}, \sigma \in S_{\tilde{\sigma}_{0n}}) \\
& \geq C_1 D_4 \exp \left[ -c_1 D_2' \tilde{\epsilon}_n^{-1/\beta} \{\log(1/\tilde{\epsilon}_n)\}^{2+1/\tau+1/\beta} - D_5 \tilde{\epsilon}_n^{-\kappa/\beta} \{\log(1/\tilde{\epsilon}_n)\}^{\kappa/\beta} \right] \\
& \geq C_1 D_4 \exp \left[ - (c_1 D_2' \vee D_5) \tilde{\epsilon}_n^{\kappa^*/\beta} \{\log(1/\tilde{\epsilon}_n)\}^{2+1/\tau+\kappa^*/\beta} \right] \\
& \geq \exp \left\{ - (c_1 D_2' \vee D_5) n \tilde{\epsilon}_n^2 \right\}
\end{aligned}$$

for all large  $n$  and some constants  $c_1, D_2'$  and  $D_5 > 0$  not depending on  $(n, p)$ . By taking  $C_{\mathcal{H}} = (c_1 D_2' \vee D_5)$ , it completes the proof.  $\blacksquare$

*Proof (Proof of Theorem ??)* Suppose  $\lambda \|\theta_0\|_1 \leq C_\lambda s_0 \log p$  for some constant  $C_\lambda > 0$ . Let  $B := \{(\theta, \eta) : s_\theta \geq R\}$  for some  $R > s_0$  and  $E_n$  be the event (2.2), then we have

$$\begin{aligned}
& \mathbb{E}_{\theta_0, \eta_0} \Pi(B \mid D_n) \\
& \leq \mathbb{E}_{\theta_0, \eta_0} [\Pi(B \mid D_n) I_{E_n}] + \mathbb{P}_{\theta_0, \eta_0}(E_n^c) \\
& \leq \mathbb{E}_{\theta_0, \eta_0} \left[ \frac{\int_B R_n(\theta, \eta) d\Pi(\theta, \eta)}{\int R_n(\theta, \eta) d\Pi(\theta, \eta)} I_{E_n} \right] + o(1) \\
& \leq \exp \left[ C_{\text{lower}} \left\{ -\log \pi_p(s_0) + s_0 \log p + \lambda \|\theta_0\|_1 + n \tilde{\epsilon}_n^2 \right\} \right] \cdot \Pi(B) + o(1) \\
& \leq \exp \left[ C_{\text{lower}} \left\{ (A_3 + 1) s_0 \log p + s_0 \log p + C_\lambda s_0 \log p + n^{\frac{\kappa^*}{2\beta + \kappa^*}} (\log n)^{2t_0} \right\} \right] \\
& \quad \times \Pi(B) + o(1) \\
& \leq \exp \left[ C_{\text{lower}} (A_3 + 2 + C_\lambda) \left\{ s_0 \vee n^{\frac{\kappa^*}{2\beta + \kappa^*}} (\log n)^{2t_0 - 1} \right\} \log p \right] \cdot \Pi(B) + o(1)
\end{aligned}$$

by Lemma 1 and condition (?). Note that

$$\begin{aligned}
\Pi(B) & \leq \sum_{s=R}^p \pi_p(s_0) \left( \frac{A_2}{p^{A_4}} \right)^{s-s_0} \\
& \leq 2\pi_p(s_0) \left( \frac{A_2}{p^{A_4}} \right)^{R-s_0} \\
& \leq \exp \left\{ - (R - s_0) \frac{A_4}{2} \log p \right\}
\end{aligned}$$

by condition (?). Thus, we have

$$\begin{aligned}
& \mathbb{E}_{\theta_0, \eta_0} \Pi(B \mid D_n) \\
& \leq \exp \left[ - \left\{ (K_{\text{dim}} - 1) \frac{A_4}{2} - C_{\text{lower}} (A_3 + 2 + C_\lambda) \right\} \right. \\
& \quad \left. \times \left\{ s_0 \vee n^{\frac{\kappa^*}{2\beta + \kappa^*}} (\log n)^{2t_0 - 1} \right\} \log p \right] + o(1) \\
& = o(1)
\end{aligned}$$

by taking  $R = K_{\dim} \{s_0 \vee n^{\frac{\kappa^*}{2\beta + \kappa^*}} (\log n)^{2t_0 - 1}\}$  for some large constant  $K_{\dim} > 1 + 2A_4^{-1}C_{\text{lower}}(A_3 + 2 + C_\lambda)$ , which completes the proof.  $\blacksquare$

*Proof (Proof of Theorem ??)* Define

$$\Theta_n := \{\theta \in \Theta : \|\theta - \theta_0\|_1 \leq p^2(p + \sqrt{n}) + \|\theta_0\|_1, s_\theta \leq s_n/2\}$$

and for positive constants  $C_1$  and  $C_2$ , which will be described below, define

$$\mathcal{H}_n := \left\{ \eta(\cdot) = \int \phi_\sigma(\cdot - z) d\bar{F}(z) \text{ with } F = \sum_{h=1}^{\infty} \pi_h \delta_{z_h} : \right. \\ \left. z_h \in [-a_n, a_n], h \leq H_n; \sum_{h > H_n} \pi_h < \epsilon_n; \sigma^2 \in [\sigma_{0n}^2, \sigma_{0n}^2(1 + \epsilon_n^2)^{M_n}] \right\}, \quad (2.12)$$

where  $a_n^{a_1} = \sigma_{0n}^{-2a_2} = M_n = n$ ,  $\epsilon_n^2 = C_1 s_n \log p/n$  and  $H_n = \lfloor C_2 s_n \log p / \log n \rfloor$ . We first prove that

$$\mathbb{E}_{\theta_0, \eta_0} \Pi(\theta \in \Theta_n^c \mid D_n) = o(1) \quad \text{and} \quad (2.13)$$

$$\mathbb{E}_{\theta_0, \eta_0} \Pi(\eta \in \mathcal{H}_n^c \mid D_n) = o(1). \quad (2.14)$$

Suppose  $\lambda \|\theta_0\|_1 \leq C_\lambda s_0 \log p$  for some constant  $C_\lambda > 0$ . By Lemma 1 and Theorem ??,

$$\begin{aligned} & \mathbb{E}_{\theta_0, \eta_0} \Pi(\theta \in \Theta_n^c \mid D_n) \\ & \leq \mathbb{E}_{\theta_0, \eta_0} \Pi(\|\theta - \theta_0\|_1 > p^2(p + \sqrt{n}) + \|\theta_0\|_1 \mid D_n) + \mathbb{E}_{\theta_0, \eta_0} \Pi(s_\theta > s_n/2 \mid D_n) \\ & \leq \mathbb{E}_{\theta_0, \eta_0} [\Pi(\|\theta - \theta_0\|_1 > p^2(p + \sqrt{n}) + \|\theta_0\|_1 \mid D_n) I_{E_n}] + o(1) \\ & \leq \Pi_\Theta(\|\theta - \theta_0\|_1 > p^2(p + \sqrt{n}) + \|\theta_0\|_1) \cdot \exp\left\{ \frac{C_{\text{lower}}(A_3 + 2 + C_\lambda)}{2K_{\dim}} s_n \log p \right\} \\ & \quad + o(1), \end{aligned}$$

where  $E_n$  is the event (2.2). Note that

$$\begin{aligned} & \Pi_\Theta(\|\theta - \theta_0\|_1 > p^2(p + \sqrt{n}) + \|\theta_0\|_1) \\ & \leq \Pi_\Theta(\|\theta\|_1 > p^2(p + \sqrt{n})) \\ & = \sum_{s=1}^p \Pi_\Theta(\|\theta\|_1 > p^2(p + \sqrt{n}) \mid s_\theta = s) \pi_p(s) \\ & \leq \sum_{s=1}^p s \cdot \max_{1 \leq h \leq s} \Pi_\Theta(|\theta_h| > p(p + \sqrt{n})) \cdot p^{-A_4 s} A_2^s \\ & \leq p \cdot \exp(-\lambda p(p + \sqrt{n})) \\ & \leq \exp\left\{ -\frac{1}{2}(n + p) \right\} \end{aligned}$$

because  $\lambda p \geq \sqrt{n}$ . Thus, (2.13) holds due to condition  $s_n \log p = o(n)$ . On the other hand, by Proposition 2 of ?,

$$\begin{aligned}
& \Pi_{\mathcal{H}}(\mathcal{H}_n^c) \\
& \lesssim H_n \exp(-C'' a_n^{a_1}) + \left\{ \frac{e\alpha(\mathbb{R})}{H_n} \log \frac{1}{\epsilon_n} \right\}^{H_n} + \exp(-C'' \sigma_{0n}^{-2a_2}) \\
& \quad + \sigma_{0n}^{-2a_3} (1 + \epsilon_n^2)^{-2M_n a_3} \\
& \leq C_2 \frac{s_n \log p}{\log n} \exp(-C'' n) + \exp(-C_2 s_n \log p) + \exp(-C'' n) \\
& \quad + \exp(-C_1 a_3 s_n \log p) \\
& \leq \exp \left\{ -\frac{(C_1 a_3 \wedge C_2)}{2} s_n \log p \right\}.
\end{aligned}$$

Then, we have

$$\begin{aligned}
& \mathbb{E}_{\theta_0, \eta_0} \Pi(\eta \in \mathcal{H}_n^c \mid D_n) \\
& \leq \mathbb{E}_{\theta_0, \eta_0} [\Pi(\eta \in \mathcal{H}_n^c \mid D_n) I_{E_n}] + o(1) \\
& \lesssim \Pi_{\mathcal{H}}(\mathcal{H}_n^c) \cdot \exp \left\{ \frac{C_{\text{lower}}(A_3 + 2 + C_\lambda)}{2K_{\text{dim}}} s_n \log p \right\} + o(1) \\
& \leq \exp \left[ -\frac{1}{2} \left\{ (C_1 a_3 \wedge C_2) - \frac{C_{\text{lower}}(A_3 + 2 + C_\lambda)}{2K_{\text{dim}}} \right\} s_n \log p \right] = o(1)
\end{aligned}$$

for some large constants  $C_1$  and  $C_2 > 0$ . Thus, we have proved (2.13) and (2.14).

By Lemma 2 and Lemma 9 of ?, if for some nonincreasing function  $\epsilon \mapsto N(\epsilon)$  and some  $\epsilon'_n \geq 0$ ,

$$N\left(\frac{\epsilon}{36}, \Theta_n \times \mathcal{H}_n, d_n\right) \leq N(\epsilon),$$

for all  $\epsilon > \epsilon'_n$ , then there exists test functions  $\phi_n$  such that

$$\begin{aligned}
& \mathbb{P}_{\theta_0, \eta_0} \phi_n \lesssim \exp\left(-\frac{n}{2} \epsilon_n^2 + \log N(\epsilon_n)\right) \quad \text{and} \\
& \sup_{\substack{(\theta, \eta) \in \Theta_n \times \mathcal{H}_n \\ d_n((\theta, \eta), (\theta_0, \eta_0)) > \epsilon_n}} \mathbb{P}_{\theta, \eta}(1 - \phi_n) \lesssim \exp\left(-\frac{n}{2} \epsilon_n^2\right) \quad (2.15)
\end{aligned}$$

for all  $\epsilon_n > \epsilon'_n$ . For any  $(\theta^i, \eta_i) \in \Theta_n \times \mathcal{H}_n$ ,  $i = 1, 2$ ,

$$\begin{aligned}
& d_H^2(\eta_1(\cdot - x^T \theta^1), \eta_2(\cdot - x^T \theta^2)) \\
&= \int \left( \sqrt{\eta_1(y - x^T \theta^1)} - \sqrt{\eta_2(y - x^T \theta^2)} \right)^2 dy \\
&\leq 2 \int \left\{ \sqrt{\eta_1(y - x^T \theta^1)} - \sqrt{\eta_1(y - x^T \theta^2)} \right\}^2 dy \\
&+ 2 \int \left\{ \sqrt{\eta_1(y - x^T \theta^2)} - \sqrt{\eta_2(y - x^T \theta^2)} \right\}^2 dy \\
&\leq 2 \left\{ |x^T(\theta^1 - \theta^2)|^2 \int \left( \int_0^1 \frac{\dot{\eta}_1(y + td_{12})}{\sqrt{\eta_1(y + td_{12})}} dt \right)^2 dy + d_H^2(\eta_1, \eta_2) \right\} \\
&\leq 2 \left\{ M^2 \log p \|\theta^1 - \theta^2\|_1^2 \int_0^1 \int \left( \frac{\dot{\eta}_1(y + td_{12})}{\eta_1(y + td_{12})} \right)^2 \eta_1(y + td_{12}) dy dt \right. \\
&\quad \left. + d_H^2(\eta_1, \eta_2) \right\} \\
&\leq 2 \left\{ M^2 \log p \|\theta^1 - \theta^2\|_1^2 \cdot n^{1/a_2} + d_H^2(\eta_1, \eta_2) \right\},
\end{aligned}$$

where  $d_{12} := x^T(\theta^1 - \theta^2)$ . The last inequality holds because

$$\begin{aligned}
\left( \frac{\dot{\eta}(y)}{\eta(y)} \right)^2 \eta(y) &= \frac{\{\dot{\eta}(y)\}^2}{\eta(y)} \\
&\leq \frac{\left\{ \int \frac{|y-z|}{\sigma^2} \phi_\sigma(y-z) d\bar{F}(z) \right\}^2}{\eta(y)} \\
&\leq \int \left( \frac{y-z}{\sigma^2} \right)^2 \phi_\sigma(y-z) d\bar{F}(z)
\end{aligned}$$

by Hölder's inequality and

$$\begin{aligned}
\int \left( \frac{\dot{\eta}(y)}{\eta(y)} \right)^2 \eta(y) dy &\leq \int \int \left( \frac{y-z}{\sigma^2} \right)^2 \phi_\sigma(y-z) d\bar{F}(z) dy \\
&= \frac{1}{\sigma^2} \int \int \left( \frac{y-z}{\sigma} \right)^2 \phi_\sigma(y-z) dy d\bar{F}(z) \\
&= \frac{1}{\sigma^2} \leq \sigma_{0n}^{-2} = n^{1/a_2}.
\end{aligned}$$

Thus, we have

$$\begin{aligned}
& \log N\left(\frac{\epsilon}{36}, \Theta_n \times \mathcal{H}_n, d_n\right) \\
& \lesssim \log N\left(\frac{\epsilon}{72Mn^{1/(2a_2)}\sqrt{\log p}}, \Theta_n, \|\cdot\|_1\right) + \log N\left(\frac{\epsilon}{72}, \mathcal{H}_n, d_H\right) \\
& \leq \log\left(\sum_{j=0}^{s_n/2} \binom{p}{j} \left[\frac{p^2(p+\sqrt{n}) + \|\theta_0\|_1}{\epsilon} 72M\sqrt{n^{1/a_2}\log p}\right]^j\right) \\
& \quad + K\left\{H_n \log\left(\frac{a_n}{\sigma_{0n}\epsilon}\right) + H_n \log\left(\frac{1}{\epsilon}\right) + \log M_n\right\} \\
& \leq \log\left(\sum_{j=0}^{s_n/2} \left[\frac{p\{p^2(p+\sqrt{n}) + \|\theta_0\|_1\}}{\epsilon} 72M\sqrt{n^{1/a_2}\log p}\right]^j\right) \\
& \quad + K\left\{H_n \log\left(\frac{a_n}{\sigma_{0n}\epsilon}\right) + H_n \log\left(\frac{1}{\epsilon}\right) + \log M_n\right\} \\
& \leq s_n \log\left(\frac{p^4}{\epsilon}\right) + K\left\{\frac{C_2 s_n \log p}{\log n} \log\left(\frac{n^{1/a_1+1/(2a_2)}}{\epsilon}\right) + \frac{C_2 s_n \log p}{\log n} \log\left(\frac{1}{\epsilon}\right)\right. \\
& \quad \left. + \log n\right\} \\
& =: \log N(\epsilon)
\end{aligned}$$

for some universal constant  $K > 0$  by Proposition 2 of ?. Note that in the last term, we do not have the term  $M_n \epsilon_n^2$  while Proposition 2 in ? includes this term, because they considered  $d$ -dimensional densities. It is easy to see that from their proof, the term  $M_n \epsilon_n^2$  can be omitted if we focus on univariate ( $d = 1$ ) densities. Note that

$$\begin{aligned}
\log N(\epsilon_n) & \leq 5s_n \log p + KC_2\{2 + a_1^{-1} + (2a_2)^{-1}\}s_n \log p \\
& = [5 + KC_2\{2 + a_1^{-1} + (2a_2)^{-1}\}]s_n \log p
\end{aligned}$$

Thus, by (2.15), there exist test functions  $\phi_n$  such that

$$\mathbb{P}_{\theta_0, \eta_0} \phi_n \lesssim \exp\left(-\frac{C_1}{2}s_n \log p + [5 + KC_2\{2 + a_1^{-1} + (2a_2)^{-1}\}]s_n \log p\right)$$

and

$$\sup_{\substack{(\theta, \eta) \in \Theta_n \times \mathcal{H}_n \\ d_n((\theta, \eta), (\theta_0, \eta_0)) > \epsilon_n}} \mathbb{P}_{\theta, \eta}(1 - \phi_n) \lesssim \exp\left(-\frac{C_1}{2}s_n \log p\right).$$

Therefore, by Lemma 1, for a large constant  $C_1 > 0$  such that  $C_1 > 10 + 2KC_2\{2 + a_1^{-1} + (2a_2)^{-1}\}$  and  $C_1 > C_{\text{lower}}(A_3 + 2 + C_\lambda)/K_{\text{dim}}$ ,

$$\begin{aligned}
& \mathbb{E}_{\theta_0, \eta_0} \mathbb{P} \left( d_n((\theta, \eta), (\theta_0, \eta_0)) > \epsilon_n \mid D_n \right) \\
& \leq \mathbb{E}_{\theta_0, \eta_0} \mathbb{P} \left( (\theta, \eta) \in \Theta_n \times \mathcal{H}_n : d_n((\theta, \eta), (\theta_0, \eta_0)) > \epsilon_n \mid D_n \right) + o(1) \\
& \leq \mathbb{E}_{\theta_0, \eta_0} \left[ \mathbb{P} \left( (\theta, \eta) \in \Theta_n \times \mathcal{H}_n : d_n((\theta, \eta), (\theta_0, \eta_0)) > \epsilon_n \mid D_n \right) (1 - \phi_n) \right] \\
& \quad + o(1) \\
& \lesssim \sup_{\substack{(\theta, \eta) \in \Theta_n \times \mathcal{H}_n \\ d_n((\theta, \eta), (\theta_0, \eta_0)) > \epsilon_n}} \mathbb{P}_{\theta, \eta}(1 - \phi_n) \cdot \exp \left\{ \frac{C_{\text{lower}}(A_3 + 2 + C_\lambda)}{2K_{\text{dim}}} s_n \log p \right\} + o(1) \\
& = o(1).
\end{aligned}$$

It completes the proof by taking  $K_{\text{Hel}} = \sqrt{C_1} > \sqrt{C_{\text{lower}}(A_3 + 2 + C_\lambda)/K_{\text{dim}}} \sqrt{10 + 2KC_2\{2 + a_1^{-1} + (2a_2)^{-1}\}}$ .  $\blacksquare$

*Proof (Proof of Corollary ??)* Let  $(T_z(\eta))(x) = \eta(x + z)$ . Note that for any  $\eta_0$  satisfying (D1)-(D4) and  $\eta \in \mathcal{H}_{\text{mix}}$ ,

$$\begin{aligned}
\inf_{z \in \mathbb{R}} d_H(\eta, T_z(\eta_0)) & \leq d_H(\eta, T_{x^T(\theta - \theta_0)}(\eta_0)) \\
& = \left[ \int (\sqrt{\eta(y)} - \sqrt{\eta_0(y + x^T(\theta - \theta_0))})^2 dy \right]^{1/2} \\
& = \left[ \int (\sqrt{\eta(y - x^T\theta)} - \sqrt{\eta_0(y - x^T\theta_0)})^2 dy \right]^{1/2} \\
& = d_H(\eta(\cdot - x^T\theta), \eta_0(\cdot - x^T\theta_0)),
\end{aligned}$$

thus

$$\begin{aligned}
\inf_{z \in \mathbb{R}} d_H(\eta, T_z(\eta_0)) & \leq \left[ \frac{1}{n} \sum_{i=1}^n d_H^2(\eta(\cdot - x_i^T\theta), \eta_0(\cdot - x_i^T\theta_0)) \right]^{1/2} \\
& = d_n((\theta, \eta), (\theta_0, \eta_0)).
\end{aligned}$$

For any  $z \in \mathbb{R}$ ,

$$\begin{aligned}
d_H^2(\eta_0, T_z(\eta_0)) &= \int (\sqrt{\eta_0(y+z)} - \sqrt{\eta_0(y)})^2 dy \\
&\leq z^2 \int \left( \int_0^1 \frac{\dot{\eta}_0(y+tz)}{\sqrt{\eta_0(y+tz)}} dt \right)^2 dy \\
&\leq z^2 \int \int_0^1 \left( \frac{\dot{\eta}_0(y+tz)}{\eta_0(y+tz)} \right)^2 \eta_0(y+tz) dt dy \\
&= z^2 \int_0^1 \int \left( \frac{\dot{\eta}_0(y+tz)}{\eta_0(y+tz)} \right)^2 \eta_0(y+tz) dy dt \\
&= z^2 \mathbb{E}_{\eta_0} \left( \frac{\dot{\eta}_0}{\eta_0} \right)^2 \\
&\leq z^2 \mathbb{E}_{\eta_0} \left( \frac{|\dot{\eta}_0|}{\eta_0} \right)^{2\beta+\nu} \leq z^2 C_{2\beta+\nu}
\end{aligned}$$

for some constant  $C_{2\beta+\nu} > 0$  depending only on  $(\beta, \nu)$  because of condition (D3) on  $\eta_0$  and  $2\beta + \nu \geq 2$ .

If  $|z| \leq d_H(\eta, \eta_0)/(2\sqrt{C_{2\beta+\nu}})$ , then

$$\begin{aligned}
d_H(\eta, T_z(\eta_0)) &\geq d_H(\eta, \eta_0) - d_H(\eta_0, T_z(\eta_0)) \\
&\geq d_H(\eta, \eta_0) - \sqrt{C_{2\beta+\nu}}|z| \\
&\geq \frac{1}{2}d_H(\eta, \eta_0),
\end{aligned}$$

and otherwise, if  $|z| > d_H(\eta, \eta_0)/(2\sqrt{C_{2\beta+\nu}})$

$$\begin{aligned}
d_H(\eta, T_z(\eta_0)) &\geq \frac{1}{2}d_V(\eta, T_z(\eta_0)) \\
&= \sup_B |\eta(B) - T_z(\eta_0)(B)| \\
&\geq \left| \int_0^\infty \eta(y) dy - \int_0^\infty \eta_0(y+z) dy \right| \\
&= \left| \int_0^\infty \eta(y) dy - \int_{-z}^\infty \eta_0(y+z) dy - \int_0^{-z} \eta_0(y+z) dy \right| \\
&= \int_0^{|z|} \eta_0(y) dy \tag{2.16} \\
&\geq \left\{ \int_0^1 \eta_0(y) dy \right\} \wedge \left\{ (2\sqrt{C_{2\beta+\nu}})^{-1} d_H(\eta, \eta_0) \inf_{0 \leq y \leq 1} \eta_0(y) \right\},
\end{aligned}$$

where (2.16) holds due to the symmetric assumption (D4) and  $\eta \in \mathcal{H}_{\text{mix}}$ .



Thus, we have

$$\begin{aligned} K_{\text{Hel}} \sqrt{\frac{s_n \log p}{n}} &\geq d_n((\theta, \eta), (\theta_0, \eta_0)) \\ &\geq \inf_{z \in \mathbb{R}} d_H(\eta, T_z(\eta_0)) \\ &\geq \left[ \frac{1}{2} \wedge \left\{ \frac{1}{2\sqrt{C_{2\beta+\nu}}} \inf_{0 \leq y \leq 1} \eta_0(y) \right\} \right] d_H(\eta, \eta_0) \end{aligned}$$

because  $s_n \log p = o(n)$ , which completes the proof by taking  $K_{\text{eta}} = K_{\text{Hel}} \left[ \frac{1}{2} \wedge \left\{ \frac{1}{2\sqrt{C_{2\beta+\nu}}} \inf_{0 \leq y \leq 1} \eta_0(y) \right\} \right]^{-1}$ .  $\blacksquare$

### 3 Proofs for Bernstein von-Mises Theorem

We first present three lemmas (Lemma 3, Lemma 4 and Lemma 5), which directly appear in the proof of Theorem ???. Other auxiliary results used to prove these lemmas will be provided in Section 5.

**Lemma 3** *Assume that the prior conditions (??), (??) and (??)-(??) hold. Let*

$$\mathcal{H}'_n = \left\{ \eta(\cdot) = \int \phi_\sigma(\cdot - z) d\bar{F}(z) \text{ with } F = \sum_{h=1}^{\infty} \pi_h \delta_{z_h} : \right. \\ \left. z_h \in [-a_n, a_n], h \leq H_n; \sum_{h>H_n} \pi_h < \epsilon_n; \sigma^2 \in [\sigma_{0n}^2, \log n \wedge \{\sigma_{0n}^2(1 + \epsilon_n^2)^{M_n}\}] \right\},$$

where  $a_n = (\log n)^{\frac{2}{\tau}}$ ,  $\epsilon_n^2 = C_1 s_n \log p / n$ ,  $H_n = \lfloor C_2 s_n \log p / \log n \rfloor$ ,  $\sigma_{0n}^{-2a_2} = s_n \log p$ ,  $M_n = n$  for some positive constants  $C_1$  and  $C_2$ , and define

$$\mathcal{H}_n^* := \left\{ \eta \in \mathcal{H}'_n : d_H(\eta, \eta_0) \leq K_{\text{eta}} \sqrt{s_n \log p / n} \right\}. \quad (3.17)$$

Then,

$$\mathbb{E}_{\theta_0, \eta_0} \Pi(\eta \in (\mathcal{H}_n^*)^c \mid D_n) = o(1)$$

for any  $\eta_0$  satisfying (D1)-(D5).

*Proof* We have

$$\begin{aligned} &\mathbb{E}_{\theta_0, \eta_0} \Pi(\eta \in (\mathcal{H}_n^*)^c \mid D_n) \\ &\leq \mathbb{E}_{\theta_0, \eta_0} \Pi(\eta \in (\mathcal{H}'_n)^c \mid D_n) \\ &+ \mathbb{E}_{\theta_0, \eta_0} \Pi\left(d_H(\eta, \eta_0) > K_{\text{eta}} \sqrt{\frac{s_n \log p}{n}} \mid D_n\right). \end{aligned} \quad (3.18)$$

Note that Lemma 1 still holds for the prior  $\Pi_{\mathcal{H}}$  with the support conditions (??) and (??) because the proof of Theorem 4 of ? can be easily modified for the priors with the restricted support with (??) and (??). Thus,

$$\begin{aligned} & \mathbb{E}_{\theta_0, \eta_0} \Pi(\eta \in (\mathcal{H}'_n)^c \mid D_n) \\ & \leq \mathbb{E}_{\theta_0, \eta_0} [\Pi(\eta \in (\mathcal{H}'_n)^c \mid D_n) I_{E_n}] + o(1) \\ & \leq \Pi_{\mathcal{H}}((\mathcal{H}'_n)^c) \exp \left\{ \frac{C_{\text{lower}}(A_3 + 2 + C_\lambda)}{2K_{\text{dim}}} \tilde{s}_n \log p \right\} + o(1), \end{aligned}$$

where  $E_n$  is the event (2.2),  $\tilde{s}_n = 2K_{\text{dim}} \{s_0 \vee n^{\frac{\kappa^*}{2\beta + \kappa^*}} (\log n)^{2t_0 - 1}\}$  and  $t_0 = \{\kappa^*(1 + \tau^{-1} + \beta^{-1}) + 1\} / (2 + \kappa^* \beta^{-1})$ . With a slight modification of the proof of Proposition 2 in ?,

$$\begin{aligned} \Pi_{\mathcal{H}}((\mathcal{H}'_n)^c) & \lesssim H_n \exp \left\{ -C'' a_n^{a_1} \right\} + \left\{ \frac{e\alpha(\mathbb{R})}{H_n} \log \left( \frac{1}{\epsilon_n} \right) \right\}^{H_n} \\ & \quad + \exp(-C'' \sigma_{0n}^{-2a_2}) + \sigma_{0n}^{-2a_3} (1 + \epsilon_n^2)^{-2M_n a_3} \\ & \leq \exp \left\{ -\frac{1}{2} (C_1 a_3 \wedge C_2 \wedge C'') s_n \log p \right\}. \end{aligned}$$

Thus,

$$\begin{aligned} & \mathbb{E}_{\theta_0, \eta_0} \Pi(\eta \in (\mathcal{H}'_n)^c \mid D_n) \\ & \lesssim \exp \left\{ -\frac{1}{2} (C_1 a_3 \wedge C_2 \wedge C'') s_n \log p + \frac{C_{\text{lower}}(A_3 + 2 + C_\lambda)}{2K_{\text{dim}}} \tilde{s}_n \log p \right\} + o(1) \\ & = o(1) \end{aligned}$$

for some large constant  $K_{\text{dim}} > 1$ . Furthermore, it is easy to see that Corollary ?? also holds for the prior  $\Pi_{\mathcal{H}}$  with (??) and (??), which implies that (3.18) is of order  $o(1)$ .  $\blacksquare$

**Lemma 4** *Suppose that  $(s_n \log p)^{1 + \frac{\zeta}{a_2}} = o(n^{1-\zeta})$  holds for some constant  $\zeta > 0$ . Further assume that  $\psi(s_n)$  is bounded away from zero. Let  $A_S := \{h \in \mathbb{R}^{|S|} : \|h\|_1 > M_n s_n \sqrt{\log p}\}$  for some sequence  $M_n$  such that  $\sqrt{\log p} = o(M_n)$ . Then*

$$\sup_{S \in \mathcal{S}_n} \sup_{\eta \in \mathcal{H}_n^*} \frac{\int_{A_S} \exp(h^T G_{n,\eta,S} - \frac{1}{2} h^T V_{n,\eta,S} h) dh}{\int_{\mathbb{R}^{|S|}} \exp(h^T G_{n,\eta,S} - \frac{1}{2} h^T V_{n,\eta,S} h) dh} = o_{P_0}(1), \quad (3.19)$$

where  $\mathcal{H}_n^*$  defined at (3.17) and

$$\mathcal{S}_n := \left\{ S : |S| \leq \frac{s_n}{2}, \|\theta_{0,S^c}\|_2 \leq \frac{K_{\text{theta}}}{\psi(s_n)} \sqrt{\frac{s_n \log p}{n}} \right\}.$$

*Proof* Note that

$$\mathbb{E}_{\theta_0, \eta_0} \left( \sup_{S \in \mathcal{S}_n} \sup_{\eta \in \mathcal{H}_n^*} \|G_{n,\eta,S}\|_\infty \right) \lesssim \log p$$

by Lemma 12 and  $|h^T G_{n,\eta,S}| \leq \|h\|_1 \cdot \|G_{n,\eta,S}\|_\infty$ . Also note that

$$\begin{aligned} h^T V_{n,\eta,S} h &= \nu_\eta \cdot h^T \Sigma_S h \\ &= \frac{\nu_\eta}{n} \cdot \|X_S h\|_2^2 \\ &\geq \nu_\eta \cdot \phi^2(s_n) \|h\|_1^2 \cdot \frac{1}{s_n} \geq \nu_\eta \cdot \psi^2(s_n) \|h\|_1^2 \cdot \frac{1}{s_n}. \end{aligned}$$

Thus, we have

$$\begin{aligned} \sup_{S \in \mathcal{S}_n} \sup_{h \in A_S} \sup_{\eta \in \mathcal{H}_n^*} \frac{|h^T G_{n,\eta,S}|}{h^T V_{n,\eta,S} h} &\lesssim \sup_{S \in \mathcal{S}_n} \sup_{h \in A_S} \sup_{\eta \in \mathcal{H}_n^*} \frac{\|h\|_1 \cdot \|G_{n,\eta,S}\|_\infty \cdot s_n}{\nu_\eta \psi^2(s_n) \cdot \|h\|_1^2} \\ &\leq o_{P_0}(1), \end{aligned}$$

because  $\sqrt{\log p} = o(M_n)$  and  $\nu_{\eta_0} \gtrsim 1$  holds by Lemma 7 and assumptions on  $\eta_0$ . It implies that

$$\begin{aligned} &\sup_{S \in \mathcal{S}_n} \sup_{\eta \in \mathcal{H}_n^*} \int_{A_S} \exp\left(h^T G_{n,\eta,S} - \frac{1}{2} h^T V_{n,\eta,S} h\right) dh \\ &\leq \sup_{S \in \mathcal{S}_n} \sup_{\eta \in \mathcal{H}_n^*} \int_{A_S} \exp(-C h^T V_{n,\eta,S} h) dh \\ &\leq \int_{A_S} \exp(-\tilde{C} \|h\|_2^2) dh \\ &\leq (\sqrt{\pi} M_n^2 s_n \log p)^{\frac{s_n}{2}} \exp\left(-\frac{1}{3} \tilde{C}' M_n^2 s_n \log p\right) \end{aligned}$$

for some positive constants  $C, \tilde{C}$  and  $\tilde{C}'$ , and all sufficiently large  $n$  with  $\mathbb{P}_{\theta_0, \eta_0}$ -probability tending to 1. It is easy to show that

$$\begin{aligned} &\int \exp\left(h^T G_{n,\eta,S} - \frac{1}{2} h^T V_{n,\eta,S} h\right) dh \\ &= (2\pi)^{\frac{|S|}{2}} |V_{n,\eta,S}|^{-\frac{1}{2}} \exp\left(\frac{1}{2\nu_\eta} \|H_S \dot{L}_{n,\eta}\|_2^2\right), \end{aligned}$$

where  $H_S = X_S (X_S^T X_S)^{-1} X_S^T$  and  $\dot{L}_{n,\eta} = \left(\dot{\ell}_\eta(y_i - x_i^T \theta_0)\right)_{i=1}^n \in \mathbb{R}^n$ . Therefore, the log of the left hand side of (3.19) is bounded above by

$$\begin{aligned} &\frac{s_n}{2} \log(\sqrt{\pi} M_n^2 s_n \log p) - \frac{1}{3} \tilde{C}' M_n^2 s_n \log p - \frac{|S|}{2} \log(2\pi) + \frac{1}{2} \log |V_{n,\eta,S}| \\ &\quad - \frac{1}{2\nu_\eta} \|H_S \dot{L}_{n,\eta}\|_2^2 \\ &\leq \frac{s_n}{2} \log(\sqrt{\pi} M_n^2 s_n \log p) - \frac{1}{3} \tilde{C}' M_n^2 s_n \log p + \frac{s_n}{4} \log(M_n^2 \nu_\eta) \end{aligned}$$

with  $\mathbb{P}_{\theta_0, \eta_0}$ -probability tending to 1. The last term tends to  $-\infty$  as  $n \rightarrow \infty$ , thus we get the desired result.  $\blacksquare$

Define

$$\Theta_n^* := \left\{ \theta \in \Theta : S_\theta \in \mathcal{S}_n, \|\theta - \theta_0\|_1 \leq K_{\text{theta}} \frac{s_n}{\phi(s_n)} \sqrt{\frac{\log p}{n}}, \right. \\ \left. \|\theta - \theta_0\|_2 \leq K_{\text{theta}} \frac{1}{\psi(s_n)} \sqrt{\frac{s_n \log p}{n}}, \|X(\theta - \theta_0)\|_2 \leq K_{\text{theta}} \sqrt{s_n \log p} \right\}, \quad (3.20)$$

and let  $M_n \Theta_n^*$  be the variant of  $\Theta_n^*$  with  $M_n K_{\text{theta}}$  instead of  $K_{\text{theta}}$ .

**Lemma 5 (Misspecified LAN: version 1)** *Suppose that  $s_n^6(\log p)^{11} = o(n^{1-\zeta})$ ,  $(s_n \log p)^{1+\frac{15}{a_2}} = o(n^{1-\zeta})$  and  $(s_n \log p)^{6+\frac{5}{4a_2}} (\log p)^{\frac{5}{2}} = o(n^{1-\zeta})$  hold for some constant  $\zeta > 0$ . Further assume that  $\psi(s_n)$  is bounded away from zero. Define  $\Theta_n^*$  and  $\mathcal{H}_n^*$  as (3.20) and (3.17), respectively, and let*

$$r_n(\theta, \eta) \\ := L_n(\theta, \eta) - L_n(\theta_0, \eta) - \sqrt{n}(\theta - \theta_0)^T \mathbb{G}_n \dot{\ell}_{\theta_0, \eta_0} + \frac{n}{2}(\theta - \theta_0)^T V_{n, \eta_0}(\theta - \theta_0).$$

Then, we have

$$\mathbb{E}_{\theta_0, \eta_0} \left( \sup_{\theta \in M_n \Theta_n^*} \sup_{\eta \in \mathcal{H}_n^*} |r_n(\theta, \eta)| \right) = o(1)$$

for any  $\eta_0$  satisfying (D1)-(D5) and some sequence  $M_n$  such that  $\sqrt{\log p} = o(M_n)$ .

*Proof* Define  $\tilde{r}_n(\theta, \eta)$  as in Lemma 11. Note that

$$\mathbb{E}_{\theta_0, \eta_0} \left( \sup_{\theta \in M_n \Theta_n^*} \sup_{\eta \in \mathcal{H}_n^*} |r_n(\theta, \eta)| \right) \\ \leq \mathbb{E}_{\theta_0, \eta_0} \left( \sup_{\theta \in M_n \Theta_n^*} \sup_{\eta \in \mathcal{H}_n^*} |r_n(\theta, \eta) - \tilde{r}_n(\theta, \eta)| \right) \\ + \mathbb{E}_{\theta_0, \eta_0} \left( \sup_{\theta \in M_n \Theta_n^*} \sup_{\eta \in \mathcal{H}_n^*} |\tilde{r}_n(\theta, \eta)| \right),$$

and, by Lemma 11,

$$\mathbb{E}_{\theta_0, \eta_0} \left( \sup_{\theta \in M_n \Theta_n^*} \sup_{\eta \in \mathcal{H}_n^*} |\tilde{r}_n(\theta, \eta)| \right) \\ \lesssim \frac{M_n^2 s_n^2}{\phi^2(s_n)} \log p \cdot \sqrt{\frac{s_n (\log p)^3 + (s_n \log p)^{\frac{3}{a_2}} (\log p)^4}{n}} (s_n \log p)^{\zeta'} \\ + \frac{M_n^3 s_n}{\phi(s_n)} \sqrt{\frac{\log p}{n}} \cdot s_n (\log p)^{\frac{3}{2}} \\ = o(1)$$

for some small constant  $\zeta' > 0$  and some sequence  $M_n$  when  $(s_n \log p)^{1+\frac{15}{a_2}} = o(n^{1-\zeta})$  and  $(s_n \log p)^{6+\frac{5}{4a_2}} (\log p)^{\frac{5}{2}} = o(n^{1-\zeta})$ . Thus, it suffices to show that

$$\mathbb{E}_{\theta_0, \eta_0} \left( \sup_{\theta \in M_n \Theta_n^*} \sup_{\eta \in \mathcal{H}_n^*} |r_n(\theta, \eta) - \tilde{r}_n(\theta, \eta)| \right) = o(1).$$

By the definition of  $r_n(\theta, \eta)$  and  $\tilde{r}_n(\theta, \eta)$ ,

$$|r_n(\theta, \eta) - \tilde{r}_n(\theta, \eta)| \leq \sqrt{n} \left| (\theta - \theta_0)^T \mathbb{G}_n(\dot{\ell}_{\theta_0, \eta} - \dot{\ell}_{\theta_0, \eta_0}) \right| \quad (3.21)$$

$$+ \frac{n}{2} \left| (\theta - \theta_0)^T (V_{n, \eta} - V_{n, \eta_0})(\theta - \theta_0) \right|. \quad (3.22)$$

The supremum of (3.22) is easily bounded above by

$$\begin{aligned} & \sup_{\theta \in M_n \Theta_n^*} \sup_{\eta \in \mathcal{H}_n^*} n \left| (\theta - \theta_0)^T (V_{n, \eta} - V_{n, \eta_0})(\theta - \theta_0) \right| \\ &= \sup_{\theta \in M_n \Theta_n^*} \sup_{\eta \in \mathcal{H}_n^*} |\nu_\eta - \nu_{\eta_0}| \cdot \|X(\theta - \theta_0)\|_2^2 \\ &\lesssim \sup_{\theta \in M_n \Theta_n^*} \sup_{\eta \in \mathcal{H}_n^*} \epsilon_n^{\frac{2}{5} - \frac{\zeta}{2}} M_n^2 s_n \log p \end{aligned}$$

by Lemma 8, where  $\epsilon_n = K_{\text{eta}} \sqrt{s_n \log p / n}$ , which is of order  $o(1)$  under the assumption  $s_n^6 (\log p)^{11} = o(n^{1-\zeta})$ . Note that

$$\begin{aligned} \sqrt{n} \left| (\theta - \theta_0)^T \mathbb{G}_n(\dot{\ell}_{\theta_0, \eta} - \dot{\ell}_{\theta_0, \eta_0}) \right| &\leq \sqrt{n} \|\theta - \theta_0\|_1 \cdot \|\mathbb{G}_n(\dot{\ell}_{\theta_0, \eta} - \dot{\ell}_{\theta_0, \eta_0})\|_\infty \\ &\lesssim \frac{M_n s_n}{\phi(s_n)} \sqrt{\log p} \cdot \sup_{\eta \in \mathcal{H}_n^*} \|\mathbb{G}_n(\dot{\ell}_{\theta_0, \eta} - \dot{\ell}_{\theta_0, \eta_0})\|_\infty. \end{aligned}$$

Define

$$\mathcal{L}_{n, j} := \left\{ M_n s_n \sqrt{\log p} \cdot e_j^T (\dot{\ell}_{\theta_0, \eta} - \dot{\ell}_{\theta_0, \eta_0}) : \eta \in \mathcal{H}_n^* \right\}$$

and  $\mathcal{L}_n := \cup_{j=1}^p \mathcal{L}_{n, j}$ , where  $e_j$  is the  $j$ th unit vector in  $\mathbb{R}^p$ . Then  $L_n(x, y) := M \sqrt{\log p} \cdot M_n s_n \sqrt{\log p} \cdot \sup_{\eta \in \mathcal{H}_n^*} |\dot{\ell}_\eta(y) - \dot{\ell}_{\eta_0}(y)|$  is an envelop function of  $\mathcal{L}_n$ , and

$$\begin{aligned} \|L_n\|_n &\lesssim M_n s_n \log p \cdot \left\{ \mathbb{E}_{\theta_0, \eta_0} \left[ \sup_{\eta \in \mathcal{H}_n^*} (\dot{\ell}_\eta(Y) - \dot{\ell}_{\eta_0}(Y))^2 \right] \right\}^{\frac{1}{2}} \\ &\lesssim M_n s_n \log p \cdot \left( \frac{s_n \log p}{n} \right)^{\frac{1}{5} - \zeta} \end{aligned}$$

by Lemma 8. We will use Corollary A.1 in ?, which implies

$$\begin{aligned} & M_n s_n \sqrt{\log p} \cdot \mathbb{E}_{\theta_0, \eta_0} \left( \sup_{\eta \in \mathcal{H}_n^*} \|\mathbb{G}_n(\dot{\ell}_{\theta_0, \eta} - \dot{\ell}_{\theta_0, \eta_0})\|_\infty \right) \\ &\lesssim \int_0^{\|L_n\|_n} \sqrt{\log N_{[]}^n(\epsilon, \mathcal{L}_n)} d\epsilon. \end{aligned}$$

Note that

$$N_{[]}^n(\epsilon, \mathcal{L}_{n,j}) \leq N_{[]} \left( \frac{\epsilon}{MM_n s_n \log p}, \mathcal{G}_n, L_2(P_{\eta_0}) \right),$$

where  $\mathcal{G}_n := \{\dot{\ell}_\eta : \eta \in \mathcal{H}_n^*\}$ , and

$$\begin{aligned} \log N_{[]}(\epsilon, \mathcal{G}_n, L_2(P_{\eta_0})) &\leq \log N_{[]}(\epsilon^\gamma, \mathcal{H}_n^*, d_H) \\ &\leq \log N_{[]}(\epsilon^\gamma, \mathcal{H}_n, d_H). \end{aligned} \quad (3.23)$$

Let  $a_n = (\log n)^{\frac{2}{\tau}}$ ,  $b_{1n} = (s_n \log p)^{-\frac{1}{2a_2}}$  and  $b_{2n} = \sqrt{\log n}$ . By Lemma 3 of ?,

$$\log N(\epsilon, \mathcal{H}_n, \|\cdot\|_\infty) \lesssim \frac{a_n}{b_{1n}} \cdot \log \frac{1}{\epsilon} \cdot \left( \log \frac{1}{\epsilon} + \log \frac{a_n}{b_{1n}} \right).$$

Now we use the similar argument to the proof of Theorem 6 of ?. Define

$$H(x) = b_{1n}^{-1} \phi \left( \frac{x}{2b_{2n}} \right) I(|x| > 2a_n) + b_{1n}^{-1} \phi(0) I(|x| \leq 2a_n),$$

where  $\phi$  is the density function of the standard normal distribution.  $H$  is an envelop function for  $\mathcal{H}_n$ . For some  $\varrho > 0$ , let  $g_1, \dots, g_T$  be a  $\varrho$ -net for  $\|\cdot\|_\infty$ ,  $l_i := (g_i - \varrho) \vee 0$  and  $u_i := (g_i + \varrho) \wedge H$ . Then, the brackets  $[l_i, u_i]$  cover  $\mathcal{H}_n$ . Let  $\varrho = C\epsilon^2(a_n b_{2n})^{-1} [\log(1/\epsilon)]^{-\frac{1}{2}}$  for some constant  $C > 0$ , then for  $D_n = 2a_n b_{2n} [\log(1/\epsilon)]^{\frac{1}{2}} > 2a_n$ ,

$$\begin{aligned} \int (u_i - l_i) d\mu &\lesssim \|u_i - l_i\|_\infty \cdot D_n + \int_{|x| > D_n} \frac{1}{b_{1n}} \phi \left( \frac{x}{2b_{2n}} \right) dx \\ &\lesssim \varrho \cdot D_n + \frac{b_{2n}}{b_{1n}} \exp \left( -\frac{D_n^2}{8b_{2n}^2} \right) \\ &\lesssim \epsilon^2 + \frac{b_{2n}}{b_{1n}} \cdot \epsilon^{ca_n^2} \\ &\lesssim \epsilon^2 \end{aligned}$$

for some constant  $c > 0$  and any  $\epsilon < 1$ . The second inequality follows from the Chernoff's inequality. Thus,

$$\begin{aligned} \log N_{[]}(\epsilon, \mathcal{H}_n, d_H) &\leq \log N_{[]}(\epsilon^2, \mathcal{H}_n, \|\cdot\|_1) \\ &\leq \log N \left( C \cdot \frac{\epsilon^2}{a_n b_{2n}} \left[ \log \frac{1}{\epsilon} \right]^{-\frac{1}{2}}, \mathcal{H}_n, \|\cdot\|_\infty \right) \\ &\lesssim \frac{a_n}{b_{1n}} \cdot \left[ \left( \log \frac{1}{\epsilon} \right)^2 + (\log n)^2 \right], \end{aligned}$$

and by (3.23),

$$\begin{aligned} \log N_{[]}^n(\epsilon, \mathcal{L}_n) &\leq \log p + \log N_{[]} \left( \frac{\epsilon}{MM_n s_n \log p}, \mathcal{G}_n, L_2(P_{\eta_0}) \right) \\ &\lesssim \log p + (s_n \log p)^{\frac{1}{2a_2}} [\log n]^{\frac{2}{\tau}} \cdot \left[ \left( \log \frac{1}{\epsilon} \right)^2 + (\log n)^2 \right]. \end{aligned}$$

Then by Corollary A.1 in ?, we have

$$\begin{aligned}
& \mathbb{E}_{\theta_0, \eta_0} \left( \sup_{\eta \in \mathcal{H}_n^*} \|\mathbb{G}_n(\dot{\ell}_{\theta_0, \eta} - \dot{\ell}_{\theta_0, \eta_0})\|_\infty \right) \cdot \frac{M_n s_n}{\phi(s_n)} \sqrt{\log p} \\
& \lesssim \int_0^{\|L_n\|_n} \sqrt{\log N_{[]}^n(\epsilon, \mathcal{L}_n)} d\epsilon \\
& \lesssim \int_0^{\|L_n\|_n} \sqrt{\log p + (s_n \log p)^{\frac{1}{4a_2}} [\log n]^{\frac{1}{\tau}}} \cdot \left( \log \frac{1}{\epsilon} + \log n \right) d\epsilon \\
& \lesssim \|L_n\|_n \sqrt{\log p + (s_n \log p)^{\frac{1}{4a_2}} [\log n]^{\frac{1}{\tau}+1}} \cdot \int_0^{\|L_n\|_n} \log \frac{1}{\epsilon} d\epsilon \\
& \lesssim M_n s_n \log p \cdot \left( \frac{s_n \log p}{n} \right)^{\frac{1}{5}-\zeta'} \left\{ \sqrt{\log p + (s_n \log p)^{\frac{1}{4a_2}} [\log n]^{\frac{1}{\tau}+1}} \right\} \quad (3.24)
\end{aligned}$$

because  $\int_0^u \log(1/\epsilon) d\epsilon \leq \int_0^u \epsilon^{-1+\zeta''} d\epsilon \lesssim u^{1-\zeta''}$  for any small  $\zeta'' > 0$  and  $0 < u < 1$ . (3.24) converges to zero as  $n \rightarrow \infty$  under the assumptions  $(s_n \log p)^{6+\frac{5}{4a_2}} (\log p)^{\frac{5}{2}} = o(n^{1-\zeta})$  and  $s_n^6 (\log p)^{11} = o(n^{1-\zeta})$  for some constant  $\zeta > 0$ . Thus, we have shown (3.21), and this completes the proof. ■

Now, we prove Theorem ?? using the above results (Lemma 3, Lemma 4 and Lemma 5) and posterior convergence rate results (Theorem ??, Corollary ?? and Corollary ??).

*Proof (Proof of Theorem ??)* Let  $\Theta_n^*$  and  $\mathcal{H}_n^*$  be defined as (3.20) and (3.17), respectively. Define  $\check{\Pi}_\Theta := \Pi_\Theta |_{M_n \Theta_n^*}$  and  $\check{\Pi}_\mathcal{H} := \Pi_\mathcal{H} |_{\mathcal{H}_n^*}$  as the restricted and renormalized priors on  $M_n \Theta_n^*$  and  $\mathcal{H}_n^*$ , respectively. Let  $\check{\Pi}(\cdot | D_n)$  be the posterior distribution corresponding to the prior  $\check{\Pi} = \check{\Pi}_\Theta \times \check{\Pi}_\mathcal{H}$ . We first prove that

$$d_V \left( \check{\Pi}(\cdot | D_n), \Pi(\cdot | D_n) \right) = o_{P_0}(1) \quad \text{and} \quad (3.25)$$

$$d_V \left( \check{\Pi}^\infty(\cdot | D_n), \Pi^\infty(\cdot | D_n) \right) = o_{P_0}(1), \quad (3.26)$$

where  $\check{\Pi}^\infty(\cdot | D_n) := \Pi^\infty(\cdot | D_n) |_{M_n \Theta_n^*}$ . Note that for any measurable set  $A \in \Theta \times \mathcal{H}$ ,

$$\begin{aligned}
\check{\Pi}(A | D_n) &= \frac{\Pi(A \cap [M_n \Theta_n^* \times \mathcal{H}_n^*] | D_n)}{\Pi(M_n \Theta_n^* \times \mathcal{H}_n^* | D_n)} \\
&= \frac{\Pi(A | D_n) - \Pi(A \cap [M_n \Theta_n^* \times \mathcal{H}_n^*]^c | D_n)}{\Pi(\Theta \times \mathcal{H}_{\text{mix}} | D_n) - \Pi([M_n \Theta_n^* \times \mathcal{H}_n^*]^c | D_n)} \\
&= \Pi(A | D_n) + o_{P_0}(1)
\end{aligned}$$

by Corollaries ??, ?? and Lemma 3, which implies (3.25). Define

$$\mathcal{S}_n := \left\{ S : |S| \leq \frac{s_n}{2}, \quad \|\theta_{0, S^c}\|_2 \leq \frac{K_{\text{theta}}}{\psi(s_n)} \sqrt{\frac{s_n \log p}{n}} \right\}, \quad (3.27)$$

$\Theta_S^* := \{\theta_S \in \mathbb{R}^{|S|} : \tilde{\theta}_S \in M_n \Theta_n^*\}$  and  $H_S := \sqrt{n}(\Theta_S^* - \theta_{0,S})$  for some sequence  $M_n$  such that  $\sqrt{\log p} = o(M_n)$  and

$$\sup_{\theta \in M_n \Theta_n^*} \sup_{\eta \in \mathcal{H}_n^*} |r_n(\theta, \eta)| = o_{P_0}(1),$$

where  $r_n(\theta, \eta)$  is defined in Lemma 5. Then,

$$\begin{aligned} d\check{\Pi}(\theta | D_n) &= \sum_{S \in \mathcal{S}_n} \tilde{w}_S \cdot d\tilde{Q}_S(\theta_S) d\delta_0(\theta_{S^c}), \\ d\check{\Pi}^\infty(\theta | D_n) &= \sum_{S \in \mathcal{S}_n} \tilde{w}_S^\infty \cdot n^{-\frac{|S|}{2}} d\tilde{N}_{n,S}(h_S) d\delta_0(\theta_{S^c}), \end{aligned}$$

where  $\tilde{Q}_S = Q_S |_{\Theta_S^*}$  and  $\tilde{N}_{n,S} := N_{n,S} |_{H_S}$  are the restricted and renormalized distributions,

$$\begin{aligned} \tilde{w}_S &:= \frac{Q_S(\Theta_S^*)}{\sum_{S' \in \mathcal{S}_n} w_{S'} Q_{S'}(\Theta_{S'}^*)} \cdot w_S, \\ \tilde{w}_S^\infty &:= \frac{N_{n,S}(H_S)}{\sum_{S' \in \mathcal{S}_n} w_{S'} N_{n,S'}(H_{S'})} \cdot w_S, \end{aligned}$$

and  $h_S = \sqrt{n}(\theta_S - \theta_{0,S}) \in H_S$ . It is easy to show that

$$\sup_{S \in \mathcal{S}_n} \left| 1 - \frac{w_S}{\tilde{w}_S^\infty} \right| = o_{P_0}(1) \quad \text{and} \quad (3.28)$$

$$\sup_{S \in \mathcal{S}_n} d_V(N_{n,S}, \tilde{N}_{n,S}) = o_{P_0}(1) \quad (3.29)$$

hold by Theorem ?? and Lemma 4. Then, by Lemma 4.5 in ?,

$$\begin{aligned} & d_V\left(\check{\Pi}^\infty(\cdot | D_n), \check{\Pi}(\cdot | D_n)\right) \\ & \leq 2d_V(\tilde{w}^\infty, w) + \sum_{S \in \mathcal{S}} w_S d_V(\tilde{N}_{n,S}, N_{n,S}) \\ & \leq 2 \sum_{S \in \mathcal{S}_n} \tilde{w}_S^\infty \left| 1 - \frac{w_S}{\tilde{w}_S^\infty} \right| + \sum_{S \in \mathcal{S}_n} w_S \cdot \sup_{S \in \mathcal{S}_n} d_V(\tilde{N}_{n,S}, N_{n,S}) \\ & \quad + 4 \sum_{S \in \mathcal{S}_n^c} w_S, \end{aligned}$$

where  $w = (w_S)_{S \in \mathcal{S}}$  and  $\tilde{w}^\infty = (\tilde{w}_S^\infty)_{S \in \mathcal{S}_n}$ . It implies that (3.26) holds by (3.28), (3.29) and Theorem ??.

Now we have (3.25) and (3.26), so it suffices to prove that

$$d_V\left(\check{\Pi}(\cdot | D_n), \check{\Pi}^\infty(\cdot | D_n)\right) = o_{P_0}(1). \quad (3.30)$$



Again by Lemma 4.5 in ?, if we show that

$$d_V(\tilde{w}, \tilde{w}^\infty) = o_{P_0}(1) \quad \text{and} \quad (3.31)$$

$$\sup_{S \in \mathcal{S}_n} d_V(\tilde{Q}_S, \tilde{N}_{n,S}) = o_{P_0}(1), \quad (3.32)$$

where  $\tilde{w} = (\tilde{w}_S)_{S \in \mathcal{S}_n}$ , it implies the desired result, (3.30). Note that

$$\begin{aligned} d_V(\tilde{w}, \tilde{w}^\infty) &= \sum_{S \in \mathcal{S}_n} |\tilde{w}_S - \tilde{w}_S^\infty| \\ &= \sum_{S \in \mathcal{S}_n} \left| 1 - \frac{\tilde{w}_S}{\tilde{w}_S^\infty} \right| \cdot \tilde{w}_S^\infty \\ &= \sum_{S \in \mathcal{S}_n} \left| 1 - Q_S(\Theta_S^*) \frac{w_S}{\tilde{w}_S^\infty} (1 + o_{P_0}(1)) \right| \cdot \tilde{w}_S^\infty \\ &= \sum_{S \in \mathcal{S}_n} |1 - Q_S(\Theta_S^*) (1 + o_{P_0}(1))| \cdot \tilde{w}_S^\infty \\ &\leq \sup_{S \in \mathcal{S}_n} (1 - Q_S(\Theta_S^*)) + o_{P_0}(1) = o_{P_0}(1). \end{aligned}$$

The third and fourth equality hold by Theorem ??, Corollary ?? and (3.28), respectively. Thus, we have proved (3.31). For any measurable set  $B$ ,

$$\begin{aligned} &\check{H}(\theta_S \in B \mid D_n, \eta, S_\theta = S) \\ &= \frac{\int_{B \cap \Theta_S^*} \exp(L_n(\tilde{\theta}_S, \eta) - L_n(\theta_0, \eta)) \cdot g_S(\theta_S) / g_S(\theta_{0,S}) d\theta_S}{\int_{\Theta_S^*} \exp(L_n(\tilde{\theta}_S, \eta) - L_n(\theta_0, \eta)) \cdot g_S(\theta_S) / g_S(\theta_{0,S}) d\theta_S} \\ &= \frac{\int_{B \cap \Theta_S^*} \exp(\sqrt{n}(\theta_S - \theta_{0,S})^T G_{n,\eta_0,S} - \frac{n}{2}(\theta_S - \theta_{0,S})^T V_{n,\eta_0,S}(\theta_S - \theta_{0,S})) d\theta_S}{\int_{\Theta_S^*} \exp(\sqrt{n}(\theta_S - \theta_{0,S})^T G_{n,\eta_0,S} - \frac{n}{2}(\theta_S - \theta_{0,S})^T V_{n,\eta_0,S}(\theta_S - \theta_{0,S})) d\theta_S} \\ &\quad + o_{P_0}(1) \end{aligned}$$

by Lemma 5 and

$$\begin{aligned} \sup_{S \in \mathcal{S}_n} \sup_{\theta_S \in \Theta_S^*} \left| \log \frac{g_S(\theta_S)}{g_S(\theta_{0,S})} \right| &= \sup_{S \in \mathcal{S}_n} \sup_{\theta_S \in \Theta_S^*} \left| \log \exp(\lambda \|\theta_{0,S} - \theta_S\|_1) \right| \\ &\lesssim \sup_{S \in \mathcal{S}_n} \lambda \cdot \frac{M_n s_n}{\phi(s_n)} \sqrt{\frac{\log p}{n}} = o(1) \end{aligned}$$

for some sequence  $M_n$  such that  $\sqrt{\log p} = o(M_n)$  because we assume  $\lambda s_n \log p = o(\sqrt{n})$ . Then,

$$\begin{aligned} \tilde{Q}_S(h_S \in B) &= \int_{\mathcal{H}_n^*} \check{H}(h_S \in B \mid D_n, \eta, S_\theta = S) d\check{H}(\eta \mid D_n, S_\theta = S) \\ &= \int_{\mathcal{H}_n^*} \tilde{N}_{n,S}(B) d\check{H}(\eta \mid D_n, S_\theta = S) + o_{P_0}(1) \\ &= \tilde{N}_{n,S}(B) + o_{P_0}(1), \end{aligned}$$

which implies  $\sup_{S \in \mathcal{S}_n} d_V(\tilde{Q}_S, \tilde{N}_{n,S}) = o_{P_0}(1)$ . ■

#### 4 Proof for Strong Model Selection Consistency

*Proof (Proof of Theorem ??)* Define  $\mathcal{S}_n$  and  $\check{H}$  as in the proof of Theorem 3.5. Define the set  $\mathcal{S}'_n = \{S \in \mathcal{S}_n : S \supseteq S_0\}$ , then it suffices to show that  $\check{H}(S_\theta \in \mathcal{S}'_n \mid D_n) \rightarrow 0$  by (3.25). Note that

$$\begin{aligned} & \check{H}(S_\theta = S \mid D_n, \eta) \\ &= \frac{\pi_p(|S|) \binom{p}{|S|}^{-1} \int_{\Theta_S^*} \exp\left(L_n(\tilde{\theta}_S, \eta) - L_n(\theta_0, \eta)\right) g_S(\theta_S) d\theta_S}{\sum_{S \in \mathcal{S}_n} \pi_p(|S|) \binom{p}{|S|}^{-1} \int_{\Theta_S^*} \exp\left(L_n(\tilde{\theta}_S, \eta) - L_n(\theta_0, \eta)\right) g_S(\theta_S) d\theta_S}. \end{aligned}$$

Then, by Lemma 5,

$$\begin{aligned} & \check{H}(S_\theta \in \mathcal{S}'_n \mid D_n, \eta) \\ &= \frac{\sum_{S \in \mathcal{S}'_n} \pi_p(|S|) \binom{p}{|S|}^{-1} \int_{\Theta_S^*} \exp\left(L_n(\tilde{\theta}_S, \eta) - L_n(\theta_0, \eta)\right) g_S(\theta_S) d\theta_S}{\sum_{S \in \mathcal{S}_n} \pi_p(|S|) \binom{p}{|S|}^{-1} \int_{\Theta_S^*} \exp\left(L_n(\tilde{\theta}_S, \eta) - L_n(\theta_0, \eta)\right) g_S(\theta_S) d\theta_S} \\ &\leq \sum_{S \in \mathcal{S}'_n} \frac{\hat{w}_S}{\hat{w}_{S_0}} e^{2\xi_n} \\ &\lesssim \sum_{s=s_0+1}^{s_n/2} \frac{\pi_p(s)}{\pi_p(s_0)} \binom{s}{s_0} \left(\frac{\lambda\sqrt{\pi}}{\sqrt{2\nu\eta_0}}\right)^{s-s_0} \\ &\quad \times \max_{|S|=s} \left[ \frac{|X_{S_0}^T X_{S_0}|^{1/2}}{|X_S^T X_S|^{1/2}} \exp\left\{\frac{1}{2\nu\eta_0} \|(H_S - H_{S_0})\dot{L}_{n,\eta_0}\|_2^2\right\} \right] \end{aligned}$$

for any  $\eta$  and some sequence  $\xi_n \rightarrow 0$ , where

$$\begin{aligned} & \hat{w}_S \\ &\propto \pi_p(|S|) \binom{p}{|S|}^{-1} \times \\ &\quad \int_{\Theta_S^*} \exp\left(\sqrt{n}(\theta_S - \theta_{0,S})^T G_{n,S} - \frac{n}{2}(\theta_S - \theta_{0,S})^T V_{n,S}(\theta_S - \theta_{0,S})\right) g_S(\theta_S) d\theta_S. \end{aligned}$$

Note that, by the condition on  $\pi_p$  and the definition of  $\psi^2(s)$ ,  $\pi_p(s)/\pi_p(s_0) \leq A_2^{s-s_0} p^{-A_4(s-s_0)}$  and  $|X_{S_0}^T X_{S_0}|/|X_S^T X_S| \leq (n\psi^2(s_n))^{|S|-s_0}$  for any  $S \in \mathcal{S}'_n$ . Thus, it suffices to prove that

$$\begin{aligned} & \mathbb{P}_{\eta_0} \left( \frac{1}{2\nu\eta_0} \|(H_S - H_{S_0})\dot{L}_{n,\eta_0}\|_2^2 > K_{\text{sel}}(s - s_0) \log p, \text{ for some } S \in \mathcal{S}'_n \right) \\ &= o(1) \end{aligned} \tag{4.33}$$

for some positive constant  $K_{\text{sel}}$  depending only on  $\eta_0$  such that  $A_4 > K_{\text{sel}}$ .

The left hand side of (4.33) is bounded above by

$$\begin{aligned} & \sum_{s=s_0+1}^{s_n/2} \binom{p-s_0}{s-s_0} \mathbb{P}_{\eta_0} \left( \|(H_S - H_{S_0}) \dot{L}_{n,\eta_0}\|_2^2 > 2\nu_{\eta_0} K_{\text{sel}}(s-s_0) \log p \right) \\ & \leq \sum_{s=s_0+1}^{s_n/2} \binom{p-s_0}{s-s_0} e^{-t \cdot 2\nu_{\eta_0} K_{\text{sel}}(s-s_0) (\log p - \nu_{\eta_0} K_{\text{sel}}^{-1})} \times \mathbb{E}_{\theta_0, \eta_0} e^{t \|(H_S - H_{S_0}) \dot{L}_{n,\eta_0}\|_2^2} \end{aligned}$$

for any  $t > 0$ , where  $H_S = X_S(X_S^T X_S)^{-1} X_S^T$ . Note that  $\dot{\ell}_{\eta_0}(y_i - x_i^T \theta_0)$  is a sub-Gaussian by assumption. By Lemma B.2 in ? (Hanson-Wright inequality),

$$\mathbb{E}_{\theta_0, \eta_0} e^{t_0 \|(H_S - H_{S_0}) \dot{L}_{n,\eta_0}\|_2^2} \lesssim e^{C(|S| - s_0)}$$

for some positive constants  $C$  and  $t_0$  depending only on  $\eta_0$ . Thus, if we choose  $K_{\text{sel}} = (\nu_{\eta_0} t_0)^{-1}$ , the left hand side of (4.33) tends to zero as  $n \rightarrow \infty$ . ■

## 5 Auxiliary Lemmas

We first introduce Lemma 6, which is used to prove lemmas 7, 8 and 9.

**Lemma 6** *Let  $B$  be a subset of  $\mathbb{R}$  and for given  $\epsilon > 0$ ,  $p$  and  $q$  be probability densities on  $\mathbb{R}$  such that  $d_H^2(p, q) \leq \epsilon^2$ . Suppose  $M_\delta^2 := \int_B p(p/q)^\delta < \infty$  for some  $\delta \in (0, 1)$ . Then,*

$$\int_B p \left( \log \frac{p}{q} \right)^2 \leq 20\epsilon^2 \left[ \frac{1}{\delta} \left( 1 \vee \log \frac{M_\delta}{\epsilon} \right) \right]^2.$$

*Proof* The main strategy for the proof is similar to the proof of Theorem 5 in ?. Note that

$$\int_B p \left( \log \frac{p}{q} \right)^2 \leq \int_{0 < p/q \leq K^2} p \left( \log \frac{p}{q} \right)^2 + \int_{B \cap (p/q > K^2)} p \left( \log \frac{p}{q} \right)^2$$

for any  $K > 0$ . Let  $K^\delta = e \vee (M_\delta/\epsilon) > 1$  and  $r = \sqrt{p/q} - 1$ . Then,

$$\begin{aligned} \int_{0 < p/q \leq K^2} p \left( \log \frac{p}{q} \right)^2 &= \int_{-1 < r \leq K-1} q(r+1)^2 (2 \log(r+1))^2 \\ &= \int_{-1 < r \leq K-1, r \neq 0} q r^2 \left( \frac{r+1}{r} \right)^2 (2 \log(r+1))^2 \\ &\leq 16 \int_{-1 < r \leq K-1, r \neq 0} q r^2 (\log K)^2 \leq 16\epsilon^2 (\log K)^2 \end{aligned}$$

because  $(x+1)/x \log(x+1)$  is increasing for  $x > -1, x \neq 0$  and  $\int qr^2 = d_H^2(p, q) \leq \epsilon^2$  by assumption. On the other hand,

$$\begin{aligned} \int_{B \cap (p/q > K^2)} p \left( \log \frac{p}{q} \right)^2 &= \int_{B \cap (p/q > K^2)} p \left( \frac{p}{q} \right)^\delta \frac{(\log \frac{p}{q})^2}{(\frac{p}{q})^\delta} \\ &\leq \int_{B \cap (p/q > K^2)} p \left( \frac{p}{q} \right)^\delta \frac{(2 \log K)^2}{K^{2\delta}} \\ &\leq 4M_\delta^2 \frac{(\log K)^2}{K^{2\delta}}, \end{aligned}$$

because  $\log x/x^\delta$  is decreasing for  $x \geq e^{1/\delta}$ . Thus, we have

$$\begin{aligned} \int_B p \left( \log \frac{p}{q} \right)^2 &\leq 16\epsilon^2 (\log K)^2 + 4M_\delta^2 \frac{(\log K)^2}{K^{2\delta}} \\ &\leq 20\epsilon^2 \left[ \frac{1}{\delta} \left( 1 \vee \log \frac{M_\delta}{\epsilon} \right) \right]^2 \end{aligned}$$

by the definition of  $K$ . ■

The following lemma gives a (uniform) convergence rate for the score function, which plays an important role in proving the BvM theorem. This lemma is used to prove lemmas 4 and 12.

**Lemma 7** *Let  $\epsilon_n = K_{\text{eta}} \sqrt{s_n \log p/n}$  and assume that  $(s_n \log p)^2 = o(n)$ . For any constant  $\zeta > 0$ , there exists a constant  $K_\zeta > 0$  not depending on  $(n, p)$  such that*

$$\int \sup_{\eta \in \mathcal{H}_n^*} \left( \dot{\ell}_\eta(y) - \dot{\ell}_{\eta_0}(y) \right)^2 dP_{\eta_0}(y) \leq K_\zeta (\epsilon_n)^{\frac{4}{5} - \zeta} (s_n \log p)^{\frac{16}{5a_2}}$$

for any  $\eta_0$  satisfying (D1)-(D5) and all sufficiently large  $n$ , where  $\mathcal{H}_n^*$  defined at (3.17).

*Proof* We first state some inequalities that we frequently use in the proof. For any  $\eta \in \mathcal{H}_n^*$  and any  $y \in \mathbb{R}$ ,

$$\begin{aligned}
|\ell_\eta(y)| &= \left| \log \left\{ \int (2\pi\sigma^2)^{-1/2} \exp\left(-\frac{(y-z)^2}{2\sigma^2}\right) d\bar{F}(z) \right\} \right| \\
&\leq \left| \log \left\{ (s_n \log p)^{\frac{1}{2a_2}} \exp\left(-\frac{y^2 + (\log n)^{\frac{4}{\tau}}}{s_n \log p}\right) \right\} \right| \\
&\leq \frac{1}{a_2} \log(s_n \log p) + \left\{ y^2 + (\log n)^{\frac{4}{\tau}} \right\} (s_n \log p)^{\frac{1}{a_2}} \\
&\leq 2 \left\{ y^2 + (\log n)^{\frac{4}{\tau}} \right\} (s_n \log p)^{\frac{1}{a_2}}, \\
|\dot{\ell}_\eta(y)| &= \left| \frac{\int -\frac{(y-z)}{\sigma^2} \phi_\sigma(y-z) d\bar{F}(z)}{\int \phi_\sigma(y-z) d\bar{F}(z)} \right| \\
&\leq \frac{1}{\sigma^2} \left\{ |y| + (\log n)^{\frac{2}{\tau}} \right\} \\
&\leq \left\{ |y| + (\log n)^{\frac{2}{\tau}} \right\} (s_n \log p)^{\frac{1}{a_2}}, \\
|\ddot{\ell}_\eta(y)| &= \left| \frac{\ddot{\eta}(y)}{\eta(y)} - \left\{ \frac{\dot{\eta}(y)}{\eta(y)} \right\}^2 \right| \\
&\leq \frac{|\ddot{\eta}(y)|}{\eta(y)} + |\dot{\ell}_\eta(y)|^2 \\
&\leq \frac{1}{\eta(y)} \left| \int \frac{1}{\sigma^2} \phi_\sigma(y-z) d\bar{F}(z) + \int \frac{(y-z)^2}{\sigma^4} \phi_\sigma(y-z) d\bar{F}(z) \right| \\
&\quad + 2 \left\{ y^2 + (\log n)^{\frac{4}{\tau}} \right\} (s_n \log p)^{\frac{2}{a_2}} \\
&\leq \frac{1}{\sigma^2} + \frac{2}{\sigma^4} \left\{ y^2 + (\log n)^{\frac{4}{\tau}} \right\} + 2 \left\{ y^2 + (\log n)^{\frac{4}{\tau}} \right\} (s_n \log p)^{\frac{2}{a_2}} \\
&\leq 5 \left\{ y^2 + (\log n)^{\frac{4}{\tau}} \right\} (s_n \log p)^{\frac{2}{a_2}}
\end{aligned}$$

and

$$\begin{aligned}
|\ddot{\ell}_\eta(y)| &= \left| \frac{\ddot{\eta}(y)}{\eta(y)} - \frac{\dot{\eta}(y)\ddot{\eta}(y)}{\{\eta(y)\}^2} - 2\dot{\ell}_\eta(y)\ddot{\ell}_\eta(y) \right| \\
&\leq \frac{1}{\eta(y)} \left\{ \int \frac{(y-z)}{\sigma^4} \phi_\sigma(y-z) d\bar{F}(z) + \int \frac{2|y-z|}{\sigma^4} \phi_\sigma(y-z) d\bar{F}(z) \right. \\
&\quad \left. + \int \frac{|y-z|^3}{\sigma^6} \phi_\sigma(y-z) d\bar{F}(z) \right\} \\
&\quad + \left\{ |y| + (\log n)^{\frac{2}{\tau}} \right\} (s_n \log p)^{\frac{1}{a_2}} 3 \left\{ y^2 + (\log n)^{\frac{4}{\tau}} \right\} (s_n \log p)^{\frac{2}{a_2}} \\
&\quad + 2 \left\{ |y| + (\log n)^{\frac{2}{\tau}} \right\} (s_n \log p)^{\frac{1}{a_2}} 5 \left\{ y^2 + (\log n)^{\frac{4}{\tau}} \right\} (s_n \log p)^{\frac{2}{a_2}} \\
&\leq 43 \left\{ |y|^3 + (\log n)^{\frac{6}{\tau}} \right\} (s_n \log p)^{\frac{3}{a_2}}.
\end{aligned}$$

Assume that a small  $\zeta > 0$  is given. Let  $A = \{y \in \mathbb{R} : |y| \leq C_1 (\log(1/\epsilon_n))^{\frac{1}{\tau}}\}$  for some large constant  $C_1 > 0$ . Note that

$$\begin{aligned} & \int_{A^c} \sup_{\eta \in \mathcal{H}_n^*} \left( \dot{\ell}_\eta(y) - \dot{\ell}_{\eta_0}(y) \right)^2 dP_{\eta_0}(y) \\ & \lesssim \int_{A^c} \sup_{\eta \in \mathcal{H}_n^*} \left( \dot{\ell}_\eta(y) \right)^2 dP_{\eta_0}(y) + \int_{A^c} \left( \dot{\ell}_{\eta_0}(y) \right)^2 dP_{\eta_0}(y). \end{aligned}$$

It is easy to show that

$$\begin{aligned} & \int_{A^c} \sup_{\eta \in \mathcal{H}_n^*} \left( \dot{\ell}_\eta(y) \right)^2 dP_{\eta_0}(y) \\ & \lesssim \int_{y > C_1 (\log \frac{1}{\epsilon_n})^{\frac{1}{\tau}}} \left( y^2 + [\log n]^{\frac{4}{\tau}} \right) e^{-by^\tau} dy \cdot (s_n \log p)^{\frac{2}{a_2}} \\ & \lesssim (\epsilon_n)^{\frac{b}{2} C_1^\tau} \cdot (s_n \log p)^{\frac{2}{a_2}} (\log n)^{\frac{4}{\tau}} \lesssim \epsilon_n \end{aligned}$$

for some constant large  $C_1 > 0$  by the assumption  $(s_n \log p)^2 = o(n)$ . Since

$$\begin{aligned} \int_{A^c} \left( \dot{\ell}_{\eta_0}(y) \right)^2 dP_{\eta_0}(y) & \lesssim \int_{y > C_1 (\log \frac{1}{\epsilon_n})^{\frac{1}{\tau}}} (|y|^{\gamma_1} + 1) e^{-by^\tau} dy \\ & \lesssim \epsilon_n \end{aligned}$$

for some large constant  $C_1 > 0$ , we have

$$\int_{A^c} \sup_{\eta \in \mathcal{H}_n^*} \left( \dot{\ell}_\eta(y) - \dot{\ell}_{\eta_0}(y) \right)^2 dP_{\eta_0}(y) \lesssim \epsilon_n.$$

Thus, it suffices to prove

$$\int_A \sup_{\eta \in \mathcal{H}_n^*} \left( \dot{\ell}_\eta(y) - \dot{\ell}_{\eta_0}(y) \right)^2 dP_{\eta_0}(y) \leq K_\zeta (\epsilon_n)^{\frac{4}{5} - \zeta} (s_n \log p)^{\frac{16}{5a_2}}$$

for some positive constants  $\zeta$  and  $K_\zeta$  not depending on  $(n, p)$ .

Define for any  $x$  and  $y \in \mathbb{R}$ ,

$$d_\eta(x, y) := \frac{\ell_\eta(y+x) - \ell_\eta(y)}{x} - \frac{\ell_{\eta_0}(y+x) - \ell_{\eta_0}(y)}{x},$$

then we have that

$$\begin{aligned} & \int_A \sup_{\eta \in \mathcal{H}_n^*} \left( \dot{\ell}_\eta(y) - \dot{\ell}_{\eta_0}(y) \right)^2 dP_{\eta_0}(y) \\ & \lesssim \int_A \sup_{\eta \in \mathcal{H}_n^*} \left( \dot{\ell}_\eta(y) - \dot{\ell}_{\eta_0}(y) - d_\eta(x, y) \right)^2 dP_{\eta_0}(y) \end{aligned} \quad (5.34)$$

$$+ \frac{1}{x^2} \int_A \sup_{\eta \in \mathcal{H}_n^*} (x d_\eta(x, y))^2 dP_{\eta_0}(y). \quad (5.35)$$

One can obtain the upper bound for (5.34) using

$$\begin{aligned}
|\dot{\ell}_\eta(y) - \dot{\ell}_{\eta_0}(y) - d_\eta(x, y)| &\leq \left| \dot{\ell}_\eta(y) - \frac{\ell_\eta(y+x) - \ell_\eta(y)}{x} \right| \\
&\quad + \left| \dot{\ell}_{\eta_0}(y) - \frac{\ell_{\eta_0}(y+x) - \ell_{\eta_0}(y)}{x} \right| \\
&\leq |x| \cdot \left\{ |\ddot{\ell}_\eta(y_1)| + |\ddot{\ell}_{\eta_0}(y_2)| \right\} \\
&\lesssim |x| \cdot \left\{ y^2 + (\log n)^{\frac{4}{\tau}} \right\} (s_n \log p)^{\frac{2}{a_2}} \\
&\lesssim |x| (s_n \log p)^{\frac{2}{a_2}} (\log n)^{\frac{4}{\tau}}
\end{aligned}$$

for any  $\eta \in \mathcal{H}_n^*$ ,  $y \in A$ , small  $|x|$  and some  $|y - y_1| \vee |y - y_2| \leq |x|$  by the Taylor expansion. Thus,

$$\int_A \sup_{\eta \in \mathcal{H}_n^*} \left( \dot{\ell}_\eta(y) - \dot{\ell}_{\eta_0}(y) - d_\eta(x, y) \right)^2 dP_{\eta_0}(y) \lesssim x^2 \cdot (s_n \log p)^{\frac{4}{a_2}} [\log n]^{\frac{8}{\tau}}. \quad (5.36)$$

Note that  $|x d_\eta(x, y)| \leq |\ell_\eta(y+x) - \ell_{\eta_0}(y+x)| + |\ell_\eta(y) - \ell_{\eta_0}(y)|$  and

$$\begin{aligned}
&\int_A \sup_{\eta \in \mathcal{H}_n^*} (\ell_\eta(y+x) - \ell_{\eta_0}(y+x))^2 dP_{\eta_0}(y) \\
&= \int_A \sup_{\eta \in \mathcal{H}_n^*} (\ell_\eta(y+x) - \ell_{\eta_0}(y+x))^2 \eta_0(y+x) \cdot \frac{\eta_0(y)}{\eta_0(y+x)} dy \\
&\lesssim \int_A \sup_{\eta \in \mathcal{H}_n^*} (\ell_\eta(y+x) - \ell_{\eta_0}(y+x))^2 \eta_0(y+x) \cdot e^{b'|y|^{\tau'}} dy
\end{aligned}$$

provided that  $|x|$  is small, by condition (D5). To calculate the upper bound for (5.35), we first find an upper bound for  $f_\eta(y) := (\ell_\eta(y) - \ell_{\eta_0}(y))^2 \eta_0(y)$  on  $y \in A$  and  $\eta \in \mathcal{H}_n^*$ . Let  $\delta_n := \epsilon_n \log(1/\epsilon_n)$  and  $B := \left\{ y \in \mathbb{R} : |y| \leq 2C_1 (\log(1/\delta_n))^{\frac{1}{\tau}} \right\}$ , so that  $A \subset B$  for all sufficiently large  $n$ . By the triangle inequality and the definition of  $\mathcal{H}_n^*$ ,

$$\begin{aligned}
|\dot{f}_\eta(y)| &= \left| 2(\ell_\eta(y) - \ell_{\eta_0}(y))(\dot{\ell}_\eta(y) - \dot{\ell}_{\eta_0}(y))\eta_0(y) + (\ell_\eta(y) - \ell_{\eta_0}(y))^2 \dot{\eta}_0(y) \right| \\
&\lesssim \sqrt{f_\eta(y)} \sqrt{\eta_0(y)} \left( |\dot{\ell}_\eta(y) - \dot{\ell}_{\eta_0}(y)| + |\ell_\eta(y) - \ell_{\eta_0}(y)| \cdot |\dot{\eta}_0(y)| \right) \quad (5.37) \\
&\lesssim \sqrt{f_\eta(y)} (s_n \log p)^{\frac{1}{a_2}} (\log n)^{\frac{4}{\tau}},
\end{aligned}$$

and

$$\begin{aligned}
&|\ddot{f}_\eta(y)| \\
&\lesssim \eta_0(y) \left\{ \left( \dot{\ell}_\eta(y) - \dot{\ell}_{\eta_0}(y) \right)^2 + |\ddot{\ell}_\eta(y) - \ddot{\ell}_{\eta_0}(y)| \cdot |\ell_\eta(y) - \ell_{\eta_0}(y)| \right. \\
&\quad \left. + |\ell_\eta(y) - \ell_{\eta_0}(y)| \cdot |\dot{\ell}_\eta(y) - \dot{\ell}_{\eta_0}(y)| \cdot |\dot{\ell}_\eta(y)| + (\ell_\eta(y) - \ell_{\eta_0}(y))^2 |\ddot{\eta}_0(y)| \right\} \quad (5.38) \\
&\lesssim (s_n \log p)^{\frac{3}{a_2}} (\log n)^{\frac{8}{\tau}}
\end{aligned}$$

for any  $\eta \in \mathcal{H}_n^*$  and  $y \in \mathbb{R}$ . By the Taylor expansion,

$$\begin{aligned} & |f_\eta(y+x) - f_\eta(y)| \\ & \lesssim |x| \sqrt{f_\eta(y)} (s_n \log p)^{\frac{1}{a_2}} (\log n)^{\frac{4}{\tau}} + x^2 (s_n \log p)^{\frac{3}{a_2}} (\log n)^{\frac{8}{\tau}} \\ & \lesssim (s_n \log p)^{\frac{1}{a_2}} [\log n]^{\frac{4}{\tau}} \left\{ |x| \sqrt{f_\eta(y)} + x^2 (s_n \log p)^{\frac{2}{a_2}} (\log n)^{\frac{4}{\tau}} \right\} \end{aligned}$$

for any  $y \in \mathbb{R}$  and small  $|x|$ . If we take  $|x| \leq C (s_n \log p)^{-\frac{3}{2a_2}} (\log n)^{-\frac{4}{\tau}} \sqrt{f_\eta(y)}$  for some small constant  $C > 0$ , it implies  $|f_\eta(y+x) - f_\eta(y)| \leq f_\eta(y)/2$  for any  $y \in \mathbb{R}$  and small  $|x|$ . Therefore, for any fixed  $y_0 \in A$ , we have  $f_\eta(y_0 + x) > f_\eta(y_0)/2$  for any  $|x| \leq C (s_n \log p)^{-\frac{3}{2a_2}} (\log n)^{-\frac{4}{\tau}} \sqrt{f_\eta(y_0)}$  for some small constant  $C > 0$ . Then,

$$\begin{aligned} \int_B f_\eta(y) dy & \geq \int_{|y-y_0| \leq C (s_n \log p)^{-\frac{3}{2a_2}} [\log n]^{-\frac{4}{\tau}} \sqrt{f_\eta(y_0)}} f_\eta(y) dy \\ & \gtrsim (s_n \log p)^{-\frac{3}{2a_2}} (\log n)^{-\frac{4}{\tau}} (f_\eta(y_0))^{\frac{3}{2}} \end{aligned} \quad (5.39)$$

for any  $y_0 \in A$  and  $\eta \in \mathcal{H}_n^*$ . On the other hand,

$$1/\eta(y) \lesssim (\log n)^{\frac{1}{2}} \exp\{2(s_n \log p)^{\frac{1}{a_2}} (\log n)^{\frac{4}{\tau}}\}$$

for any  $y \in B$  and  $\eta \in \mathcal{H}_n^*$ , which implies

$$\begin{aligned} \int_B \left\{ \frac{\eta_0(y)}{\eta(y)} \right\}^\delta \eta_0(y) dy & \lesssim \int_B \eta_0(y)^{1+\delta} (\log n)^{\frac{\delta}{2}} \exp\{2\delta (s_n \log p)^{\frac{1}{a_2}} (\log n)^{\frac{4}{\tau}}\} dy \\ & \lesssim 1 \end{aligned}$$

by taking  $\delta = (s_n \log p)^{-\frac{1}{a_2}} (\log n)^{-\frac{4}{\tau}}$ . Thus, by Lemma 6, we have

$$\int_B f_\eta(y) dy \lesssim \delta_n^2 (s_n \log p)^{\frac{2}{a_2}} [\log n]^{\frac{12}{\tau}} \quad (5.40)$$

for any  $\eta \in \mathcal{H}_n^*$ . By combining (5.39) and (5.40), it implies that

$$f_\eta(y_0) \lesssim \delta_n^{\frac{4}{3}} (s_n \log p)^{\frac{7}{3a_2}} [\log n]^{\frac{32}{3\tau}} \quad (5.41)$$

for any  $y_0 \in A$  and  $\eta \in \mathcal{H}_n^*$ .

Next, we claim that if  $f_\eta(y) \lesssim \delta_n^{d_1} (s_n \log p)^{d_2} [\log n]^{d_3}$  for some  $d_1, d_2$  and  $d_3 > 0$ , then we have  $f_\eta(y) \lesssim \delta_n^{1+\frac{3}{8}d_1-\zeta} (s_n \log p)^{\frac{3}{8}d_2+\frac{3}{2a_2}} [\log n]^{\frac{3}{8}d_3+\frac{7}{\tau}}$  for any  $y \in A$  and  $\eta \in \mathcal{H}_n^*$ . Suppose that  $f_\eta(y) \lesssim \delta_n^{d_1} (s_n \log p)^{d_2} [\log n]^{d_3}$  on  $y \in A$  and  $\eta \in \mathcal{H}_n^*$  for some positive constants  $d_1, d_2$  and  $d_3$ . Due to (5.41), there



exist constants  $d_1 = 4/3, d_2 = 7/(3a_2)$  and  $d_3 = 32/(3\tau)$  satisfying  $f_\eta(y) \lesssim \delta_n^{d_1} (s_n \log p)^{d_2} [\log n]^{d_3}$ . Note that for any small constant  $\zeta > 0$ ,

$$\begin{aligned}
& |\dot{\ell}_\eta(y) - \dot{\ell}_{\eta_0}(y)| \sqrt{\eta_0(y)} \\
& \lesssim |x| \left( |\ddot{\ell}_\eta(y_1)| + |\ddot{\ell}_{\eta_0}(y_2)| \right) \sqrt{\eta_0(y)} \\
& + \frac{|\ell_\eta(y+x) - \ell_{\eta_0}(y+x)| + |\ell_\eta(y) - \ell_{\eta_0}(y)|}{|x|} \sqrt{\eta_0(y)} \\
& \lesssim |x| (s_n \log p)^{\frac{2}{a_2}} [\log n]^{\frac{4}{\tau}} + \frac{e^{\frac{\beta'}{2}|y|^{\tau'}}}{|x|} \cdot \delta_n^{\frac{d_1}{2}} (s_n \log p)^{\frac{d_2}{2}} [\log n]^{\frac{d_3}{2}} \\
& \lesssim |x| (s_n \log p)^{\frac{2}{a_2}} [\log n]^{\frac{4}{\tau}} + \frac{1}{|x|} \delta_n^{\frac{d_1}{2} - 4\zeta} (s_n \log p)^{\frac{d_2}{2}} [\log n]^{\frac{d_3}{2}}
\end{aligned} \tag{5.42}$$

for some  $|y - y_1| \vee |y - y_2| \leq |x|$ , thus

$$|\dot{\ell}_\eta(y) - \dot{\ell}_{\eta_0}(y)| \sqrt{\eta_0(y)} \lesssim \delta_n^{\frac{d_1}{4} - 2\zeta} (s_n \log p)^{\frac{d_2}{4} + \frac{1}{a_2}} [\log n]^{\frac{d_3}{4} + \frac{2}{\tau}} \tag{5.43}$$

on  $y \in A$  and  $\eta \in \mathcal{H}_n^*$ , by taking  $|x| = \delta_n^{\frac{d_1}{4} - 2\zeta} (s_n \log p)^{\frac{d_2}{4} - \frac{1}{a_2}} [\log n]^{\frac{d_3}{4} - \frac{2}{\tau}}$ . Then, by (5.37),

$$|\dot{f}_\eta(y)| \lesssim \delta_n^{\frac{3}{4}d_1 - 2\zeta} (s_n \log p)^{\frac{3}{4}d_2 + \frac{1}{a_2}} [\log n]^{\frac{3}{4}d_3 + \frac{2}{\tau}}$$

for any  $y \in A$  and  $\eta \in \mathcal{H}_n^*$ , which implies that

$$f_\eta(y+x) \geq \frac{1}{2} f_\eta(y)$$

for any  $y \in A, \eta \in \mathcal{H}_n^*, |x| \leq C_3 \delta_n^{-\frac{3}{4}d_1 + 2\zeta} (s_n \log p)^{-\frac{3}{4}d_2 - \frac{1}{a_2}} [\log n]^{-\frac{3}{4}d_3 - \frac{2}{\tau}} f_\eta(y)$  and for some small constant  $C_3 > 0$ , by the first-order Taylor expansion. Thus, similar to (5.39),

$$\int_B f_\eta(y) dy \gtrsim (f_\eta(y_0))^2 \delta_n^{-\frac{3}{4}d_1 + 2\zeta} (s_n \log p)^{-\frac{3}{4}d_2 - \frac{1}{a_2}} [\log n]^{-\frac{3}{4}d_3 - \frac{2}{\tau}},$$

for any  $y_0 \in A, \eta \in \mathcal{H}_n^*$  and small  $\zeta > 0$ . Again by (5.40),

$$f_\eta(y) \lesssim \delta_n^{1 + \frac{3}{8}d_1 - \zeta} (s_n \log p)^{\frac{3}{8}d_2 + \frac{3}{2a_2}} [\log n]^{\frac{3}{8}d_3 + \frac{7}{\tau}}, \tag{5.44}$$

for any  $y \in A, \eta \in \mathcal{H}_n^*$  and small  $\zeta > 0$ .

Note that the upper bound (5.44) is obtained from the assumption  $\sup_{\eta \in \mathcal{H}_n^*} f_\eta(y) \lesssim \delta_n^{d_1} (s_n \log p)^{d_2} [\log n]^{d_3}$ . Thus, by applying the claim repeatedly, one can check that  $\sup_{\eta \in \mathcal{H}_n^*} f_\eta(y) \lesssim \delta_n^{\frac{8}{5} - 2\zeta} (s_n \log p)^{\frac{12}{5a_2}} [\log n]^{\frac{56}{5\tau}}$  for any  $y \in A$  and a given small constant  $\zeta > 0$ .

Therefore, we finally obtain the following upper bound

$$\begin{aligned}
& \int_A \sup_{\eta \in \mathcal{H}_n^*} \left( \dot{\ell}_\eta(y) - \dot{\ell}_{\eta_0}(y) \right)^2 dP_{\eta_0}(y) \\
& \lesssim x^2 \cdot (s_n \log p)^{\frac{4}{a_2}} [\log n]^{\frac{8}{7}} \\
& \quad + \frac{1}{x^2} \int_A \sup_{\eta \in \mathcal{H}_n^*} (\ell_\eta(y+x) - \ell_{\eta_0}(y+x))^2 \eta_0(y+x) \cdot e^{b'|y|^{r'}} dy \\
& \lesssim x^2 \cdot (s_n \log p)^{\frac{4}{a_2}} [\log n]^{\frac{8}{7}} + \frac{\delta_n^{\frac{8}{5}-2\zeta} (s_n \log p)^{\frac{12}{5a_2}} [\log n]^{\frac{56}{57}}}{x^2}
\end{aligned}$$

by (5.36). By taking  $|x| = \delta_n^{\frac{2}{5}-\zeta} (s_n \log p)^{-\frac{2}{5a_2}} [\log n]^{\frac{4}{57}}$ ,

$$\begin{aligned}
\int_A \sup_{\eta \in \mathcal{H}_n^*} \left( \dot{\ell}_\eta(y) - \dot{\ell}_{\eta_0}(y) \right)^2 dP_{\eta_0}(y) & \leq K_\zeta \delta_n^{\frac{4}{5}-\zeta} (s_n \log p)^{\frac{16}{5a_2}} [\log n]^{\frac{48}{57}} \\
& \leq K_\zeta \epsilon_n^{\frac{4}{5}-2\zeta} (s_n \log p)^{\frac{16}{5a_2}}
\end{aligned}$$

for some constant  $K_\zeta > 0$  not depending on  $(n, p)$ .  $\blacksquare$

This lemma gives slightly faster convergence rate, under stronger condition, compared with Lemma 7, and is used to prove the misspecified LAN (Lemma 5). Although Lemma 8 seems similar to Lemma 7, we stated them separately to avoid assuming redundant conditions for Lemma 7.

**Lemma 8** *Let  $\epsilon_n = K_{\text{eta}} \sqrt{s_n \log p/n}$ . For any constant  $\zeta > 0$ , there exists a constant  $K_\zeta > 0$  not depending on  $(n, p)$  such that*

$$\int \sup_{\eta \in \mathcal{H}_n^*} \left( \dot{\ell}_\eta(y) - \dot{\ell}_{\eta_0}(y) \right)^2 dP_{\eta_0}(y) \leq K_\zeta (\epsilon_n)^{\frac{4}{5}-\zeta}$$

for any  $\eta_0$  satisfying (D1)-(D5) and all sufficiently large  $n$ , provided that  $(s_n \log p)^{1+\frac{15}{a_2}} = o(n^{1-\zeta})$ , where  $\mathcal{H}_n^*$  defined at (3.17).

*Proof* Assume that a small  $\zeta > 0$  is given. Let  $\varphi_n := \epsilon_n^{\frac{4}{5}-\zeta} (s_n \log p)^{\frac{6}{5a_2}} [\log n]^{\frac{4}{7}}$ ,  $A' := \{y \in A : \eta_0(y) \gtrsim \varphi_n^2\}$  and  $B' := \{y \in B : \eta_0(y) \gtrsim \varphi_n^2\}$ , where  $A$  and  $B$  are defined in Lemma 7. Note that

$$\begin{aligned}
\int_{(A')^c} \sup_{\eta \in \mathcal{H}_n^*} \left( \dot{\ell}_\eta(y) \right)^2 dP_{\eta_0}(y) & \lesssim \int_{A^c} \sup_{\eta \in \mathcal{H}_n^*} \left( \dot{\ell}_\eta(y) \right)^2 dP_{\eta_0}(y) \\
& \quad + \int_{A \cap \{y : \eta_0(y) \lesssim \varphi_n^2\}} \sup_{\eta \in \mathcal{H}_n^*} \left( \dot{\ell}_\eta(y) \right)^2 dP_{\eta_0}(y) \\
& \lesssim \epsilon_n + \varphi_n^2 (s_n \log p)^{\frac{2}{a_2}} [\log n]^{\frac{4}{7}} \cdot \int_A (y^2 + 1) dy \\
& \lesssim \epsilon_n + \varphi_n^2 (s_n \log p)^{\frac{2}{a_2}} [\log n]^{\frac{7}{7}} \\
& \lesssim \epsilon_n^{\frac{4}{5}-\zeta},
\end{aligned}$$

provided that  $(s_n \log p)^{1+\frac{1}{a_2}} = o(n)$ . Similarly, it is easy to check that

$$\int_{(A')^c} \sup_{\eta \in \mathcal{H}_n^*} \left( \dot{\ell}_{\eta_0}(y) \right)^2 dP_{\eta_0}(y) \lesssim \epsilon_n^{4/5-\zeta}.$$

Hence, it suffices to show that

$$\int_{A'} \sup_{\eta \in \mathcal{H}_n^*} \left( \dot{\ell}_\eta(y) - \dot{\ell}_{\eta_0}(y) \right)^2 dP_{\eta_0}(y) \leq K_\zeta (\epsilon_n)^{\frac{4}{5}-\zeta}$$

for some positive constants  $\zeta$  and  $K_\zeta$ .

Note that similar to (5.42),

$$\begin{aligned} & |\ddot{\ell}_\eta(y) - \ddot{\ell}_{\eta_0}(y)| \sqrt{\eta_0(y)} \\ & \lesssim |x| \{ |\ddot{\ell}_\eta(y_1)| + |\ddot{\ell}_{\eta_0}(y_2)| \} \sqrt{\eta_0(y)} + \frac{e^{\frac{b'}{2}|y|^{\tau'}}}{|x|} |\dot{\ell}_\eta(y) - \dot{\ell}_{\eta_0}(y)| \sqrt{\eta_0(y)} \quad (5.45) \\ & \lesssim |x| (s_n \log p)^{\frac{3}{a_2}} [\log n]^{\frac{6}{\tau}} + \frac{1}{|x|} \delta_n^{\frac{2}{5}-\zeta} (s_n \log p)^{\frac{8}{5a_2}} [\log n]^{\frac{4}{\tau}} \end{aligned}$$

for some  $|y - y_1| \vee |y - y_2| \leq |x|$  on  $y \in A'$  and  $\eta \in \mathcal{H}_n^*$  by (5.43). Then, by taking appropriate  $|x|$ , we have

$$\begin{aligned} |\ddot{\ell}_\eta(y) - \ddot{\ell}_{\eta_0}(y)| \sqrt{\eta_0(y)} & \lesssim \delta_n^{\frac{1}{5}-\zeta} (s_n \log p)^{\frac{23}{10a_2}} [\log n]^{\frac{5}{\tau}} \quad (5.46) \\ & \lesssim (s_n \log p)^{\frac{4}{5a_2}} \end{aligned}$$

on  $y \in A'$  and  $\eta \in \mathcal{H}_n^*$ , because we assume that  $(s_n \log p)^{1+\frac{1}{a_2}} = o(n^{1-\zeta})$ . Suppose that  $\sup_{\eta \in \mathcal{H}_n^*} |\dot{\ell}_\eta(y) - \dot{\ell}_{\eta_0}(y)| \sqrt{\eta_0(y)} \lesssim (s_n \log p)^K$  and  $\sup_{\eta \in \mathcal{H}_n^*} f_\eta(y) \lesssim \delta_n^{d_1} (s_n \log p)^{d_2} [\log n]^{d_3}$  on  $y \in B'$  for some positive constants  $K, d_1, d_2$  and  $d_3$ . Note that from the proof of Lemma 7 and the definition of  $B'$ ,

$$\frac{\eta_0(y)}{\eta(y)} \lesssim \exp \left( \frac{\varphi_n}{\sqrt{\eta_0(y)}} \right) \lesssim 1$$

for any  $y \in B'$  and  $\eta \in \mathcal{H}_n^*$ , then, similar to (5.40), it is easy to show that

$$\int_{B'} f_\eta(y) dy \lesssim \delta_n^2, \quad (5.47)$$

by Lemma 6. Applying (5.42),

$$|\dot{\ell}_\eta(y) - \dot{\ell}_{\eta_0}(y)| \sqrt{\eta_0(y)} \lesssim \delta_n^{\frac{d_1}{4}-\zeta} (s_n \log p)^{\frac{d_2}{4} + \frac{K}{2}} [\log n]^{\frac{d_3}{4}} \quad (5.48)$$

for any  $y \in A'$  and  $\eta \in \mathcal{H}_n^*$ . Then by (5.47) and the similar arguments to the proof of Lemma 7, we have

$$f_\eta(y) \lesssim \delta_n^{1+\frac{3}{8}d_1-\zeta} (s_n \log p)^{\frac{3}{8}d_2 + \frac{K}{4}} [\log n]^{\frac{3}{8}d_3}$$

for any  $y \in A'$  and  $\eta \in \mathcal{H}_n^*$ . By a recursion, one can check that  $d_1, d_2$  and  $d_3$  converge to  $8/5 - \zeta, 2K/5$  and  $0$ , respectively. Thus, by (5.48), we have

$$|\dot{\ell}_\eta(y) - \dot{\ell}_{\eta_0}(y)|\sqrt{\eta_0(y)} \lesssim \delta_n^{\frac{2}{5}-\zeta} (s_n \log p)^{\frac{3}{5}K} \quad (5.49)$$

for any  $y \in A'$  and  $\eta \in \mathcal{H}_n^*$ , and it implies that

$$\begin{aligned} |\ddot{\ell}_\eta(y) - \ddot{\ell}_{\eta_0}(y)|\sqrt{\eta_0(y)} &\lesssim \delta_n^{\frac{1}{5}-\zeta} (s_n \log p)^{\frac{3}{2a_2} + \frac{3}{10}K} [\log n]^{\frac{5}{7}} \\ &\lesssim (s_n \log p)^{\frac{3}{10}K} \end{aligned}$$

for any  $y \in A'$  and  $\eta \in \mathcal{H}_n^*$  by (5.45). Thus, we obtain  $\sup_{\eta \in \mathcal{H}_n^*} |\ddot{\ell}_\eta(y) - \ddot{\ell}_{\eta_0}(y)|\sqrt{\eta_0(y)} \lesssim (s_n \log p)^{\frac{3}{10}K}$  from the assumption  $\sup_{\eta \in \mathcal{H}_n^*} |\dot{\ell}_\eta(y) - \dot{\ell}_{\eta_0}(y)| \times \sqrt{\eta_0(y)} \lesssim (s_n \log p)^K$  on  $y \in A'$ . Suppose that a small constant  $\zeta' > 0$  is given, then we have  $\sup_{\eta \in \mathcal{H}_n^*} |\ddot{\ell}_\eta(y)| \lesssim (s_n \log p)^{\zeta'}$  on  $y \in B'$  by repeatedly applying the above arguments. Finally, by (5.49),

$$\left(\dot{\ell}_\eta(y) - \dot{\ell}_{\eta_0}(y)\right)^2 \eta_0(y) \lesssim \delta_n^{\frac{4}{5}-\zeta}$$

for some given constant  $\zeta > 0$ , any  $y \in A'$  and  $\eta \in \mathcal{H}_n^*$ . Therefore,

$$\int_{A'} \sup_{\eta \in \mathcal{H}_n^*} \left(\dot{\ell}_\eta(y) - \dot{\ell}_{\eta_0}(y)\right)^2 dP_{\eta_0}(y) \leq K_\zeta (\epsilon_n)^{\frac{4}{5}-\zeta}$$

for some positive constants  $\zeta$  and  $K_\zeta$  not depending on  $(n, p)$ .  $\blacksquare$

**Lemma 9** *If  $(s_n \log p)^{1+\frac{11}{2a_2}} = o(n^{1-\zeta})$  for some constant  $\zeta > 0$ , we have*

$$\sup_{\eta \in \mathcal{H}_n^*} \int \left(\dot{\ell}_\eta(y) - \dot{\ell}_{\eta_0}(y)\right)^2 dP_{\eta_0}(y) = o(1)$$

for any  $\eta_0$  satisfying (D1)-(D5), where  $\mathcal{H}_n^*$  defined at (3.17).

*Proof* Note that

$$\begin{aligned} \int \left(\dot{\ell}_\eta(y) - \dot{\ell}_{\eta_0}(y)\right)^2 dP_{\eta_0}(y) &= - \int (\ell_\eta(y) - \ell_{\eta_0}(y))(\dot{\ell}_\eta(y) - \dot{\ell}_{\eta_0}(y))\dot{\eta}_0(y)dy \\ &\quad - \int (\ell_\eta(y) - \ell_{\eta_0}(y))(\ddot{\ell}_\eta(y) - \ddot{\ell}_{\eta_0}(y))\eta_0(y)dy \end{aligned}$$

follows from the integration by parts. By Lemma 6, (5.43) and (5.46), one can show that the absolute value of the above equality is bounded above by  $\epsilon_n^{\frac{6}{5}-\zeta} (s_n \log p)^{\frac{33}{10a_2}}$  for some constant  $\zeta > 0$ , up to some constant not depending on  $\eta$ , which implies the desired result.  $\blacksquare$

The following lemma is used to prove Lemma 10.

**Lemma 10** *Let  $s_n$  be a sequence of positive integers. Define*

$$\Theta_{n,1} := \{\theta \in \mathbb{R}^p : s_\theta \leq s_n, \|\theta - \theta_0\|_1 \leq 1\}$$

and  $f_{\theta, \bar{\theta}, \eta} := (\theta - \theta_0)^T \ddot{\ell}_{\bar{\theta}, \eta}(\theta - \theta_0)$ . If we assume  $(s_n \log p)^{1 + \frac{15}{a_2}} = o(n^{1-\zeta})$  for some constant  $\zeta > 0$ , then for any small constant  $\zeta' > 0$ ,

$$\begin{aligned} & \mathbb{E}_{\theta_0, \eta_0} \left( \sup_{\theta, \bar{\theta} \in \Theta_{n,1}} \sup_{\eta \in \mathcal{H}_n^*} \frac{1}{\sqrt{n}} \left| \mathbb{G}_n f_{\theta, \bar{\theta}, \eta} \right| \right) \\ & \lesssim \left( \frac{s_n (\log p)^3 + (s_n \log p)^{\frac{3}{a_2}} (\log p)^4}{n} \right)^{\frac{1}{2}} (s_n \log p)^{\zeta'} \end{aligned} \quad (5.50)$$

for any  $\eta_0$  satisfying (D1)-(D5) and all sufficiently large  $n$ , where  $\mathcal{H}_n^*$  defined at (3.17).

*Proof* Without loss of generality, we assume that  $\theta_0 = 0$ . For a given  $\zeta' > 0$ , define

$$\tilde{\mathcal{F}}_n := \left\{ \tilde{f}_{\theta, \bar{\theta}, \eta} = (s_n \log p)^{-\zeta'} (\log p)^{-1} \cdot f_{\theta, \bar{\theta}, \eta} : \theta, \bar{\theta} \in \Theta_{n,1}, \eta \in \mathcal{H}_n^* \right\}. \quad (5.51)$$

Then for any  $\tilde{f}_{\theta, \bar{\theta}, \eta} \in \tilde{\mathcal{F}}_n$ ,

$$\begin{aligned} & |\tilde{f}_{\theta, \bar{\theta}, \eta}(x, y)| \\ & \leq \sup_{\theta, \bar{\theta} \in \Theta_{n,1}} \sup_{\eta \in \mathcal{H}_n^*} (x^T \theta)^2 |\ddot{\ell}_\eta(y - x^T \bar{\theta})| (s_n \log p)^{-\zeta'} (\log p)^{-1} =: \tilde{F}_n(x, y). \end{aligned}$$

$\tilde{F}_n$  is an envelop function of  $\tilde{\mathcal{F}}_n$  such that  $\mathbb{E}_{\theta_0, \eta_0} \tilde{F}_n^2(x_i, Y_i) \lesssim 1$  for any  $i = 1, \dots, n$  because

$$\begin{aligned} & \mathbb{E}_{\theta_0, \eta_0} \tilde{F}_n^2(x, Y) \\ & = \int \sup_{\theta, \bar{\theta} \in \Theta_{n,1}} \sup_{\eta \in \mathcal{H}_n^*} (x^T \theta)^4 |\ddot{\ell}_\eta(y - x^T \bar{\theta})|^2 \eta_0(y) dy \cdot (s_n \log p)^{-2\zeta'} (\log p)^{-2} \\ & \lesssim \int_{A'} \sup_{\bar{\theta} \in \Theta_{n,1}} \sup_{\eta \in \mathcal{H}_n^*} |\ddot{\ell}_\eta(y - x^T \bar{\theta})|^2 \eta_0(y) dy \cdot (s_n \log p)^{-2\zeta'} \\ & + \int_{(A')^c} \sup_{\bar{\theta} \in \Theta_{n,1}} \sup_{\eta \in \mathcal{H}_n^*} |\ddot{\ell}_\eta(y - x^T \bar{\theta})|^2 \eta_0(y) dy \cdot (s_n \log p)^{-2\zeta'} \\ & \lesssim (s_n \log p)^{-2\zeta'} + \int_{A^c} \sup_{\bar{\theta} \in \Theta_{n,1}} \sup_{\eta \in \mathcal{H}_n^*} |\ddot{\ell}_\eta(y - x^T \bar{\theta})|^2 \eta_0(y) dy \cdot (s_n \log p)^{-2\zeta'} \\ & + \int_{A \cap \{y: \eta_0(y) \lesssim \varphi_n^2\}} \sup_{\bar{\theta} \in \Theta_{n,1}} \sup_{\eta \in \mathcal{H}_n^*} |\ddot{\ell}_\eta(y - x^T \bar{\theta})|^2 \eta_0(y) dy \cdot (s_n \log p)^{-2\zeta'} \\ & \lesssim (s_n \log p)^{-2\zeta'} + (s_n \log p)^{\frac{4}{a_2}} \varphi_n^2 (s_n \log p)^{-2\zeta'} \lesssim (s_n \log p)^{-2\zeta'} \end{aligned}$$

provided that  $(s_n \log p)^{1+\frac{15}{a_2}} = o(n)$ , where  $A, A'$  and  $\varphi_n$  are defined in the proof of Lemma 8. Thus,  $\|\tilde{F}_n\|_n^2 = n^{-1} \sum_{i=1}^n \mathbb{E}_{\theta_0, \eta_0} \tilde{F}_n^2(x_i, Y_i) \lesssim (s_n \log p)^{-2\zeta'}$ . We will use Corollary A.1 in ?, which implies

$$\begin{aligned} & \mathbb{E}_{\theta_0, \eta_0} \left( \sup_{\theta, \bar{\theta} \in \Theta_{n,1}} \sup_{\eta \in \mathcal{H}_n^*} \frac{1}{\sqrt{n}} \left| \mathbb{G}_n f_{\theta, \bar{\theta}, \eta} \right| \right) \\ & \lesssim \int_0^{\|\tilde{F}_n\|_n} \sqrt{\log N_{[]}^n(\epsilon, \tilde{\mathcal{F}}_n) d\epsilon} \cdot \frac{(s_n \log p)^{\zeta'}}{\sqrt{n}} \log p. \end{aligned} \quad (5.52)$$

Now, we calculate  $N_{[]}^n(\epsilon, \tilde{\mathcal{F}}_n)$  defined at (5.52). For  $\theta^j, \bar{\theta}^j \in \Theta_{n,1}$  and  $\eta_j \in \mathcal{H}_n^*, j = 1, 2$ , write

$$\tilde{f}_{\theta^1, \bar{\theta}^1, \eta_1} - \tilde{f}_{\theta^2, \bar{\theta}^2, \eta_2} \equiv \tilde{f}_1 + \tilde{f}_2 + \tilde{f}_3,$$

where  $\tilde{f}_1 := \tilde{f}_{\theta^1, \bar{\theta}^1, \eta_1} - \tilde{f}_{\theta^2, \bar{\theta}^1, \eta_1}$ ,  $\tilde{f}_2 := \tilde{f}_{\theta^2, \bar{\theta}^1, \eta_1} - \tilde{f}_{\theta^2, \bar{\theta}^2, \eta_1}$  and  $\tilde{f}_3 := \tilde{f}_{\theta^2, \bar{\theta}^2, \eta_1} - \tilde{f}_{\theta^2, \bar{\theta}^2, \eta_2}$ . It is easy to show  $|\tilde{f}_1(x, y)| \lesssim \|\theta^1 - \theta^2\|_1 \cdot (y^2 + 1) (s_n \log p)^{\frac{2}{a_2}} [\log n]^{\frac{4}{\tau}}$  and  $|\tilde{f}_2(x, y)| \lesssim \|\bar{\theta}^1 - \bar{\theta}^2\|_1 \cdot (|y|^3 + 1) (s_n \log p)^{\frac{3}{a_2}} [\log n]^{\frac{6}{\tau}} \sqrt{\log p}$ . Then, we have

$$\begin{aligned} & \mathbb{E}_{\theta_0, \eta_0} \left( \sup_{\theta^1, \bar{\theta}^2} \sup_{\eta_1, \eta_2} |\tilde{f}_{\theta^1, \bar{\theta}^1, \eta_1}(x, Y) - \tilde{f}_{\theta^2, \bar{\theta}^2, \eta_2}(x, Y)|^2 \right) \\ & \lesssim \sup_{\theta^1, \bar{\theta}^2} \|\theta^1 - \theta^2\|_1^2 (s_n \log p)^{\frac{6}{a_2}} [\log n]^{\frac{12}{\tau}} \log p + \mathbb{E}_{\theta_0, \eta_0} \left( \sup_{\theta^1, \bar{\theta}^2} \sup_{\eta_1, \eta_2} |\tilde{f}_3(x, Y)|^2 \right). \end{aligned}$$

To deal with  $\tilde{f}_3$ , define

$$\tilde{\mathcal{G}}_{K_n} := \left\{ \ddot{\ell}_\eta \cdot I_{[-K_n, K_n]} : \eta \in \mathcal{H}_n^* \right\}$$

and  $\tilde{H}_{K_n} := \sup_{\eta \in \mathcal{H}_n^*} \max_{k=0,1} \sup_{|y| \leq K_n} |\ddot{\ell}_\eta^{(k)}(y)|$  for some  $K_n > 0$ . Then, Theorem 2.7.1 of ?, which implies for every  $\epsilon > 0$ ,

$$\begin{aligned} \log N(\epsilon) & := \log N(\epsilon, \tilde{\mathcal{G}}_{K_n}, \|\cdot\|_\infty) \\ & \lesssim K_n \cdot \tilde{H}_{K_n} \cdot \frac{1}{\epsilon} \\ & \lesssim K_n \cdot K_n^3 (s_n \log p)^{\frac{3}{a_2}} (\log n)^{\frac{6}{\tau}} \frac{1}{\epsilon}. \end{aligned}$$

By the definition of the covering number, there is a partition  $\{\mathcal{H}^l : 1 \leq l \leq N(\epsilon)\}$  of  $\mathcal{H}_n^*$  such that

$$\begin{aligned} & \int_{|y| \leq K_n - M\sqrt{\log p}} \sup_{\theta \in \Theta_{n,1}} \sup_{\eta_1, \eta_2 \in \mathcal{H}^l} |\ddot{\ell}_{\eta_1}(y - x^T \theta) - \ddot{\ell}_{\eta_2}(y - x^T \theta)|^2 dP_{\eta_0}(y) \\ & \lesssim \int_{|y| \leq K_n - M\sqrt{\log p}} \epsilon^2 dP_{\eta_0}(y) \leq \epsilon^2. \end{aligned}$$

Let  $K_n = C(\log(1/\epsilon))^{1/\tau} + C(\log n)^{1/\tau} + M\sqrt{\log p}$  for some constant  $C > 0$ , then

$$\begin{aligned} & \int_{|y| > K_n - M\sqrt{\log p}} \sup_{\theta \in \Theta_{n,1}} \sup_{\eta \in \mathcal{H}_n^*} |\ddot{\ell}_\eta(y - x^T \theta)|^2 dP_{\eta_0}(y) \\ & \lesssim \int_{|y| > K_n - M\sqrt{\log p}} y^4 e^{-b|y|^\tau} dy \cdot (s_n \log p)^{\frac{4}{a_2}} [\log n]^{\frac{8}{\tau}} \\ & \lesssim e^{-\frac{b}{4} K_n^\tau} \cdot (s_n \log p)^{\frac{4}{a_2}} [\log n]^{\frac{8}{\tau}} \leq \epsilon^2. \end{aligned}$$

Thus, we have

$$\int \sup_{\theta^2, \tilde{\theta}^2 \in \Theta_{n,1}} \sup_{\eta_1, \eta_2 \in \mathcal{H}^l} |\tilde{f}_3(x, y)|^2 dP_{\eta_0}(y) \lesssim \epsilon^2,$$

for some constant  $C > 0$  and any  $1 \leq l \leq N(\epsilon)$ .

By the above arguments,

$$\begin{aligned} \log N_{[]}^n(\epsilon, \tilde{\mathcal{F}}_n) & \lesssim \log N(\epsilon) + \log N\left(\epsilon (s_n \log p)^{-\frac{3}{a_2}} [\log n]^{-\frac{6}{\tau}} [\log p]^{-\frac{1}{2}}, \Theta_n, \|\cdot\|_1\right) \\ & \lesssim K_n^4 (s_n \log p)^{\frac{3}{a_2}} (\log n)^{\frac{6}{\tau}} \cdot \frac{1}{\epsilon} + s_n \log p + s_n \log \frac{1}{\epsilon} \\ & \lesssim \epsilon^{-\frac{3}{2}} \cdot (s_n \log p)^{\frac{3}{a_2}} (\log n)^{\frac{6}{\tau}} (\log p)^2 + s_n \log p + s_n \log \frac{1}{\epsilon}. \end{aligned}$$

Hence, by (5.52), we get the inequality (5.50).  $\blacksquare$

The following lemma is used to prove Lemma 5.

**Lemma 11 (Misspecified LAN: version 2)** *Let  $s_n$  be a positive integer sequence and  $\epsilon_n$  be a sequence such that  $\epsilon_n \rightarrow 0$ . Define  $\Theta_{n, \epsilon_n} := \{\theta \in \Theta : s_\theta \leq s_n, \|\theta - \theta_0\|_1 \leq \epsilon_n\}$  and  $\tilde{r}_n(\theta, \eta) := L_n(\theta, \eta) - L_n(\theta_0, \eta_0) - \sqrt{n}(\theta - \theta_0)^T \mathbb{G}_n \dot{\ell}_{\theta_0, \eta} + n(\theta - \theta_0)^T V_{n, \eta}(\theta - \theta_0)/2$ . If we assume that  $(s_n \log p)^{1 + \frac{15}{a_2}} = o(n^{1-\zeta})$  for some constant  $\zeta > 0$ , then*

$$\begin{aligned} & \mathbb{E}_{\theta_0, \eta_0} \left( \sup_{\theta \in \Theta_{n, \epsilon_n}} \sup_{\eta \in \mathcal{H}_n^*} |\tilde{r}_n(\theta, \eta)| \right) \\ & \lesssim n\epsilon_n^2 \cdot \rho_n + \epsilon_n \sqrt{\log p} \cdot \sup_{\theta \in \Theta_{n, \epsilon_n}} \|X(\theta - \theta_0)\|_2^2, \end{aligned} \quad (5.53)$$

for any  $\eta_0$  satisfying (D1)-(D5) and all sufficiently large  $n$ , where  $\mathcal{H}_n^*$  defined at (3.17) and

$$\rho_n := \left( \frac{s_n (\log p)^3 + (s_n \log p)^{\frac{3}{a_2}} (\log p)^4}{n} \right)^{\frac{1}{2}} (s_n \log p)^\zeta$$

for a given constant  $\zeta' > 0$ .

*Proof* By the Taylor expansion, where  $\theta(t) := \theta_0 + t(\theta - \theta_0)$ ,

$$\begin{aligned} L_n(\theta, \eta) &= L_n(\theta(1), \eta) \\ &= L_n(\theta_0, \eta) + \frac{\partial}{\partial t} L_n(\theta(t), \eta) \Big|_{t=0} + \int_0^1 \frac{\partial^2}{\partial t^2} L_n(\theta(t), \eta) (1-t) dt. \end{aligned}$$

Since  $\mathbb{E}_{\theta_0, \eta_0} \dot{\ell}_{\theta_0, \eta} = 0$  for every  $\eta$  by (D4), we have that

$$\frac{\partial}{\partial t} L_n(\theta(t), \eta) \Big|_{t=0} = \sqrt{n}(\theta - \theta_0)^T \mathbb{G}_n \dot{\ell}_{\theta_0, \eta}$$

and

$$\frac{\partial^2}{\partial t^2} L_n(\theta(t), \eta) = n(\theta - \theta_0)^T \mathbb{P}_n \ddot{\ell}_{\theta(t), \eta} (\theta - \theta_0).$$

Define

$$\begin{aligned} A_{n1}(\theta, \eta) &:= n \int_0^1 (1-t) \frac{1}{\sqrt{n}} \mathbb{G}_n (\theta - \theta_0)^T \ddot{\ell}_{\theta(t), \eta} (\theta - \theta_0) dt, \\ A_{n2}(\theta, \eta) &:= \int_0^1 (1-t) \\ &\quad \sum_{i=1}^n \left[ (\theta - \theta_0)^T \mathbb{E}_{\theta_0, \eta_0} \left\{ \ddot{\ell}_{\theta(t), \eta}(x_i, Y_i) - \ddot{\ell}_{\theta_0, \eta}(x_i, Y_i) \right\} (\theta - \theta_0) \right] dt, \\ A_{n3}(\theta, \eta) &:= \frac{1}{2} \sum_{i=1}^n (\theta - \theta_0)^T \mathbb{E}_{\theta_0, \eta_0} \ddot{\ell}_{\theta_0, \eta}(x_i, Y_i) (\theta - \theta_0), \end{aligned}$$

then, it is easy to show that

$$\int_0^1 \frac{\partial^2}{\partial t^2} L_n(\theta(t), \eta) (1-t) dt = A_{n1}(\theta, \eta) + A_{n2}(\theta, \eta) + A_{n3}(\theta, \eta).$$

Since

$$\frac{1}{\sqrt{n}} \mathbb{G}_n (\theta - \theta_0)^T \ddot{\ell}_{\theta(t), \eta} (\theta - \theta_0) = \frac{\|\theta - \theta_0\|_1^2}{\sqrt{n}} \mathbb{G}_n \frac{(\theta - \theta_0)^T}{\|\theta - \theta_0\|_1} \ddot{\ell}_{\theta(t), \eta} \frac{(\theta - \theta_0)}{\|\theta - \theta_0\|_1},$$

we have

$$\mathbb{E}_{\theta_0, \eta_0} \left( \sup_{\theta \in \Theta_{n, \epsilon_n}} \sup_{\eta \in \mathcal{H}_n^*} |A_{n1}(\theta, \eta)| \right) \lesssim n \epsilon_n^2 \cdot \rho_n$$

by (5.50) in Lemma 10, provided that  $(s_n \log p)^{1 + \frac{15}{a_2}} = o(n^{1-\zeta})$  for some  $\zeta > 0$ . Since  $A_{n3}(\theta, \eta) = -n/2 \cdot (\theta - \theta_0)^T V_{n, \eta} (\theta - \theta_0)$ , if we only need to show that

$$\sup_{\theta \in \Theta_{n, \epsilon_n}} \sup_{\eta \in \mathcal{H}_n^*} |A_{n2}(\theta, \eta)| \lesssim \epsilon_n \sqrt{\log p} \cdot \sup_{\theta \in \Theta_{n, \epsilon_n}} \|X(\theta - \theta_0)\|_2^2,$$



where  $\theta(t) := \theta_0 + t(\theta - \theta_0)$  for  $0 \leq t \leq 1$ . To show the above inequality, it suffices to prove that

$$\begin{aligned} & (\theta - \theta_0)^T \left\{ \mathbb{E}_{\theta_0, \eta_0} \ddot{\ell}_{\theta(t), \eta}(x_i, Y_i) - \mathbb{E}_{\theta_0, \eta_0} \ddot{\ell}_{\theta_0, \eta}(x_i, Y_i) \right\} (\theta - \theta_0) \quad (5.54) \\ & \lesssim |x_i^T (\theta - \theta_0)|^2 \sqrt{\log p} \|\theta - \theta_0\|_1 \end{aligned}$$

for any  $i = 1, \dots, n$ . Note that (5.54) is bounded above by

$$\begin{aligned} & |x_i^T (\theta - \theta_0)|^2 \left| \mathbb{E}_{\theta_0, \eta_0} \left( \ddot{\ell}_\eta(Y_i - x_i^T \theta(t)) - \ddot{\ell}_\eta(Y_i - x_i^T \theta_0) \right) \right| \\ & \lesssim |x_i^T (\theta - \theta_0)|^2 \sqrt{\log p} \|\theta - \theta_0\|_1 \cdot \left| \mathbb{E}_{\theta_0, \eta_0} \ddot{\ell}_\eta(Y_i - x_i^T \theta(t_1)) \right|, \end{aligned}$$

for some constant  $0 \leq t_1 \leq t$ . Also note that

$$\begin{aligned} & \left| \mathbb{E}_{\theta_0, \eta_0} \left( \ddot{\ell}_\eta(Y - x^T \theta(t_1)) - \ddot{\ell}_{\eta_0}(Y - x^T \theta(t_1)) \right) \right| \\ & = \left| \int \left( \ddot{\ell}_\eta(y - x^T \theta(t_1)) - \ddot{\ell}_{\eta_0}(y - x^T \theta(t_1)) \right) \eta_0(y - x^T \theta_0) dy \right| \\ & = \left| \int \left( \dot{\ell}_\eta(y - x^T \theta(t_1)) - \dot{\ell}_{\eta_0}(y - x^T \theta(t_1)) \right) \dot{\eta}_0(y - x^T \theta_0) dy \right| \\ & \leq \left[ \int \left( \dot{\ell}_\eta(y) - \dot{\ell}_{\eta_0}(y) \right)^2 \eta_0(y) dy \right]^{\frac{1}{2}} \\ & \quad \times \left[ \int \left( \frac{\dot{\eta}_0(y - x^T \theta_0)}{\eta_0(y - x^T \theta_0)} \right)^2 \frac{\eta_0(y - x^T \theta_0)}{\eta_0(y - x^T \theta(t_1))} \eta_0(y - x^T \theta_0) dy \right]^{\frac{1}{2}}. \end{aligned}$$

The above equality follows from the integration by parts, and the last inequality follows from the Hölder's inequality. The last term is of order  $O(1)$  by Lemma 9. Since  $\left| \mathbb{E}_{\theta_0, \eta_0} \ddot{\ell}_{\eta_0}(Y - x^T \theta(t_1)) \right| \lesssim 1$ , it completes the proof for (5.53).  $\blacksquare$

Finally, the following lemma is used to prove Lemma 4.

**Lemma 12** *Suppose that  $(s_n \log p)^{1 + \frac{8}{a_2}} = o(n^{1-\zeta})$  holds for some constant  $\zeta > 0$ , then*

$$\mathbb{E}_{\theta_0, \eta_0} \left( \sup_{\eta \in \mathcal{H}_n^*} \|\mathbb{G}_n \dot{\ell}_{\theta_0, \eta}\|_\infty \right) \lesssim \log p$$

for any  $\eta_0$  satisfying (D1)-(D5), where  $\mathcal{H}_n^*$  defined at (3.17).

*Proof* Without loss of generality, we assume that  $\theta_0 = 0$ . Define

$$\mathcal{F}_n := \left\{ e_j^T \dot{\ell}_{\theta_0, \eta} (\log p)^{-\frac{1}{2}} : 1 \leq j \leq p, \eta \in \mathcal{H}_n^* \right\},$$

where  $e_j$  is the  $j$ th unit vector in  $\mathbb{R}^p$ . Then,

$$\sup_{\eta \in \mathcal{H}_n^*} \|\mathbb{G}_n \dot{\ell}_{\theta_0, \eta}\|_\infty = \sup_{f \in \mathcal{F}_n} |\mathbb{G}_n f| \sqrt{\log p}.$$

We first show that  $F_n(x, y) := \sup_{\eta \in \mathcal{H}_n^*} |\dot{\ell}_\eta(y) - \dot{\ell}_{\eta_0}(y)| + |\dot{\ell}_{\eta_0}(y)|$  is an envelop function of  $\mathcal{F}_n$  and  $\mathbb{E}_{\theta_0, \eta_0} F_n^2(x_i, Y_i) \lesssim 1$  for any  $i = 1, \dots, n$ . Note that for any  $f \in \mathcal{F}_n$  and  $x = (x_1, \dots, x_p)^T$ ,

$$\begin{aligned} |f(x, y)| &= \left| e_j^T \dot{\ell}_{\theta_0, \eta}(x, y) \right| (\log p)^{-\frac{1}{2}} \\ &= \left| x_j \cdot \dot{\ell}_\eta(y) \right| (\log p)^{-\frac{1}{2}} \\ &\lesssim \sup_{\eta \in \mathcal{H}_n^*} |\dot{\ell}_\eta(y) - \dot{\ell}_{\eta_0}(y)| + |\dot{\ell}_{\eta_0}(y)|. \end{aligned}$$

By Lemma 7, we have  $\mathbb{E}_{\theta_0, \eta_0} F_n^2(x_i, Y_i) \lesssim 1$  if  $(s_n \log p)^{1 + \frac{s}{a_2}} = O(n^{1-\zeta})$  for some  $\zeta > 0$ . Then, we have

$$\begin{aligned} \mathbb{E}_{\theta_0, \eta_0} \left( \sup_{\eta \in \mathcal{H}_n^*} \|\mathbb{G}_n \dot{\ell}_{\theta_0, \eta}\|_\infty \right) &\lesssim \int_0^{\|F_n\|_n} \sqrt{\log N_{[]}^n(\epsilon, \mathcal{F}_n)} d\epsilon \sqrt{\log p} \\ &\lesssim \int_0^{\|F_n\|_n} \sqrt{\epsilon^{-1} + \log p} d\epsilon \sqrt{\log p} \lesssim \log p, \end{aligned}$$

where the second inequality follows from Corollary 2.7.4 of ?. ■
